# ***Daphnia magna* modifies its gene expression extensively in response to caloric restriction revealing a novel effect on haemoglobin isoform preference**

Jack Hearn<sup>\*1</sup>, Jessica Clark<sup>2</sup>, Philip J. Wilson<sup>3</sup>, and Tom J. Little<sup>4</sup>

<sup>1</sup>Department of Vector Biology, Liverpool School of Tropical Medicine, Liverpool, United Kingdom

<sup>2</sup>Institute of Biodiversity, Animal Health & Comparative Medicine, University of Glasgow, United Kingdom

<sup>3</sup>School of Geosciences, University of Edinburgh, Edinburgh, United Kingdom

<sup>4</sup>Institute of Evolutionary Biology, School of Biological Sciences, University of Edinburgh, Edinburgh, United Kingdom

\*corresponding author: [Jack.Hearn@lstm.ac.uk](mailto:Jack.Hearn@lstm.ac.uk)

## **Email addresses:**

JH: [Jack.Hearn@lstm.ac.uk](mailto:Jack.Hearn@lstm.ac.uk)

JC: [jessica.clark@glasgow.ac.uk](mailto:jessica.clark@glasgow.ac.uk)

PJW: [phil.wilson@ed.ac.uk](mailto:phil.wilson@ed.ac.uk)

TJL: [Tom.Little@ed.ac.uk](mailto:Tom.Little@ed.ac.uk)

## **Keywords**

Caloric restriction, *Daphnia*, methylation, micro-RNA, gene expression, ecological genomics.

## 26     **Abstract**

27

28     Caloric restriction (CR) produces clear phenotypic effects within and between  
 29     generations of the model crustacean *Daphnia magna*. We have previously  
 30     established that micro RNAs and cytosine methylation change in response to CR in  
 31     this organism, and we demonstrate here that CR has a dramatic effect on gene  
 32     expression. Over 6000 genes were differentially expressed between CR and well-fed  
 33     *D. magna*, with a bias towards up-regulation of genes under caloric restriction. We  
 34     identified a highly expressed haemoglobin gene that responds to CR by changing  
 35     isoform proportions. Specifically, a transcript containing three erythrocrucrin domains  
 36     was strongly down-regulated under CR in favour of transcripts containing fewer or no  
 37     such domains. This change in the haemoglobin mix is similar to the response to  
 38     hypoxia in *Daphnia*, which is mediated through the transcription factor hypoxia-  
 39     inducible factor 1, and ultimately the mTOR signalling pathway. This is the first report  
 40     of a role for haemoglobin in the response to CR. We also observed high absolute  
 41     expression of super-oxide dismutase (SOD) in normally-fed individuals, which  
 42     contrasts with observations of high SOD levels under in CR in other taxa. However,  
 43     key differentially expressed genes, like SOD, were not targeted by differentially  
 44     expressed micro-RNAs. Whether the link between Haemoglobin and CR is the case  
 45     in other organisms, or is related to the aquatic lifestyle, remains to be tested. It  
 46     suggests that one response to CR may be to simply transport less oxygen and lower  
 47     respiration.

48

49

50

51

## 52 **Introduction**

53

54 Caloric restriction (CR) is the reduction in dietary intake of calories without  
 55 undernutrition (Koubova & Guarente, 2003). CR induces marked phenotypic  
 56 changes in many organisms. Most notably an increase in longevity has been  
 57 observed in various arthropods, rodents, yeast, and possibly also humans (Heilbronn  
 58 & Ravussin, 2003; Kapahi, Kaeberlein, & Hansen, 2017; Lakowski & Hekimi, 1998;  
 59 Redman & Ravussin, 2011; Sohal & Weindruch, 1996; Walford, Harris, & Weindruch,  
 60 1987). This occurs through CR-mediated delays in the onset of processes and  
 61 diseases associated with ageing (Koubova & Guarente, 2003; Most, Tosti, Redman,  
 62 & Fontana, 2017). As a result, moderate CR could well be beneficial to human  
 63 health, although this remains to be confirmed by sufficiently long-running clinical  
 64 trials (Most et al., 2017).

65

66 The transcriptomic response to CR has been investigated in a variety of model  
 67 organisms spanning mammals, invertebrates and yeasts (Choi et al., 2018; Ding et  
 68 al., 2014; Dobson et al., 2018; Heintz et al., 2017; Kapahi et al., 2017; Kim et al.,  
 69 2016; Matthews et al., 2017; Regan et al., 2016; Wood et al., 2015). Neuroprotective  
 70 qualities of CR have been attributed to an altered gene expression profile of CR rats  
 71 due to an altered response to oxidative stress and histone deacetylase activity, in  
 72 addition to changes to insulin-signalling pathway and longevity-associated gene  
 73 levels (Wood et al., 2015). In *Drosophila* CR responses have been characterised at  
 74 the whole-organism and tissue-level (Ding et al., 2014; Dobson et al., 2018; Kapahi  
 75 et al., 2017; Regan et al., 2016). There is an overall down-regulation of genes under

CR (Ding et al., 2014), which is a hallmark of CR (Russell & Kahn, 2007). However, despite the popularity of *Daphnia magna* for studying life-history traits and the effects of environmental stressors (Boersma, Spaak, & De Meester, 1998; Garbutt & Little, 2014, 2017; Lampert, 1987; Latta IV, Frederick, & Pfreder, 2011; Mitchell & Lampert, 2000; Orsini et al., 2016), the gene-level response to CR has not previously been studied in this species.

82

### 83 **Environmental stressors and caloric restriction in *Daphnia magna***

84

There is a wealth of existing phenotypic data in *Daphnia*, including demonstrations of CR-mediated lifespan increase (Latta IV et al., 2011), which we confirm and expand upon here. There are also clear maternal effects due to CR where *D. magna* mothers exposed to CR produce offspring that are (1) larger at birth, (2) feed at a slower rate than offspring of abundantly fed mothers, and are (3) more resistant to parasitism (Garbutt & Little, 2014, 2017). Furthermore, *Daphnia* are aquatic invertebrates, and it is possible that they respond to CR in a manner that is partially distinct from terrestrial invertebrates. We explore this novel perspective in the context of haemoglobins here.

94

### 95 ***Daphnia* Haemoglobins and the link to CR**

96

Haemoglobin (henceforward “Hb”) production was observed to increase in response to food levels in *D. magna* (Fox, Gilchrist, & Phear, 1951; Zeis, 2020). However, no further studies considered the relationship between nutrition and Hb in *Daphnia*. By contrast, it is well established that the response to hypoxia and hyper-thermal stress

100

in *D. magna* and *D. pulex* causes changes in Hb concentration and subunit components to occur (Cuenca Cambronero, Zeis, & Orsini, 2018; Gerke, Börding, Zeis, & Paul, 2011; Lai et al., 2016; Lyu et al., 2015; Zeis et al., 2003). This suggests that there is phenotypic plasticity in the *Daphnia* Hb response to stress. Interestingly, acclimation to hypoxic conditions in *D. magna* results in smaller adults without impacting on clutch size during the first five broods (Seidl, Paul, & Pirow, 2005). A phenotype which is similar to that for the offspring of CR individuals (Garbutt & Little, 2014). Links between nutrition and hypoxia have not been explored widely, but in *Drosophila* a specifically low-protein CR regime partially reverses the reduction in lifespan caused by hypoxia (Vigne & Frelin, 2006).

*Daphnia magna* encodes 12 di-domain Hb genes [as annotated in the gene-set: (Orsini et al., 2016)] that result from a complex series of duplications (Colbourne et al., 2011; Zeis, 2020). Sixteen Hb di-domains are aggregated to form the free-circulating *D. magna* Hb molecule (Zeis, 2020). Structural differences in Hb molecules comprised of the products of different Hb isoforms is correlated to changes in oxygen-binding characteristics (Zeis, 2020). The induction of Hb genes in *Daphnia* is mediated by the transcription factor hypoxia-inducible factor (HIF) (Gorr, Cahn, Yamagata, & Bunn, 2004; Zeis, 2020), a heterodimer formed from HIF-1 $\alpha$  and HIF-1 $\beta$  proteins. The HIF-1 complex is an important factor in extending longevity of *Caenorhabditis elegans* under CR (Di Chen & Kapahi, 2009; Lee, Hwang, & Kenyon, 2010; Y. Zhang, Shao, Zhai, Shen, & Powell-Coffman, 2009). Increased expression of HIF-1 alone was responsible for this and was triggered by elevated concentrations of mitochondrial reactive oxygen species (Lee et al., 2010). HIF-1 itself is regulated by the mTOR pathway (Land & Tee, 2007) and in *C. elegans* is dependent on the

inositol-requiring protein-1 (IRE-1) of the unfolded protein stress response in the endoplasmic reticulum (Di Chen & Kapahi, 2009; Kapahi et al., 2017).

## **Master control mechanisms underpinning CR responses**

The free radical theory of ageing has been linked to CR (Gladyshev, 2014; Liochev, 2013; Viña, Borras, Abdelaziz, Garcia-Valles, & Gomez-Cabrera, 2013). The theory hypothesises that ageing results from accumulated oxidative damage due to reactive oxygen species. Super-oxide dismutase (SOD), a key component of the theory (Gladyshev, 2014), defends against reactive oxygen species (ROS) by converting abundant superoxide into hydrogen peroxide and oxygen. Evidence that lacking SOD genes results in reduced lifespans across taxa supports this hypothesis (Muid, Karakaya, & Koc, 2014; Muller et al., 2006; Oka, Hirai, Yasukawa, Nakahara, & Inoue, 2015).

Four nutrient-sensing, signalling pathways are most often implicated in lifespan extension as a result of CR (Kenyon, 2010). They are 1) the insulin/insulin-like growth factor (IGF-1), 2) the mechanistic target of rapamycin (mTOR) signalling pathway, 3) 5' adenosine monophosphate-activated protein kinase (AMP Kinase), and 4) sirtuin signalling protein-modulated pathways. These pathways are complex and interlinking, with mTOR signalling potentially acting as the ultimate modulator of the other three (Johnson, Rabinovitch, & Kaeberlein, 2013).

**The present study adds expression data to data on *D. magna* miRNA and DNA methylation responses to CR**

151

152 To characterise phenotypic and genotypic ageing in a single organism, we  
 153 performed a whole organism longevity experiment on a set of eight *D. magna*  
 154 genotypes each subjected to a calorically restricted and normal diet. To contrast  
 155 gene expression between food levels, we selected one genotype that demonstrated  
 156 increased longevity here. We have previously established that life history traits  
 157 (Garbutt & Little, 2014, 2017), DNA methylation (Hearn, Pearson, Blaxter, Wilson, &  
 158 Little, 2019), and miRNA expression in the selected strain (Hearn et al., 2018)  
 159 respond to CR; indeed the miRNA was sequenced from the same set of RNA  
 160 extractions. Using gene and transcript level expression change of this CR-  
 161 responsive genotype of *D. magna* we now identify known and novel gene families  
 162 and metabolic pathways implicated in CR.

163

## 164 **Materials and Methods**

165

### 166 **Longevity experiment**

167

168 This experiment used eight genotypes from geographically dispersed populations.  
 169 These were obtained from the *D. magna* diversity panel held in Basel, Switzerland  
 170 (<http://evolution.unibas.ch/ebert/research/referencepanel/>). They are (clone ID,  
 171 Country of Origin): BEK22 (Belgium), Clone 32 (UK), FIFAV1 (Finland), GBEL75  
 172 (UK), GG8 (Germany), ILPS1 (Italy), MNDM1 (Mongolia), RUYAK1-6 (Russia). Prior  
 173 to the experiments, replicates of all genotypes were put through three generations of  
 174 acclimation to harmonise environmental effects arising from variation in stock  
 175 conditions. During this period, each individual was maintained in a 60ml glass jar

filled with artificial pond medium (Kluttgen et al., 1994). This was changed twice weekly and when offspring were produced. Each individual was fed  $\sim 6.25 \times 10^6$  *Chlorella vulgaris* cells daily and was maintained on a 12:12 L:D cycle at 20°C. We estimate cell numbers by measuring the daily optical absorbance of 650nm white light by the *Chlorella* culture, with 1.0 absorbance being equivalent to approximately  $5 \times 10^6$  algal cells. Offspring from the second clutch initiated each generation, including the experimental generation.

From the acclimated females of all eight genotypes, two offspring from clutch two were taken. One was assigned to normal food (NF:  $\sim 6.25 \times 10^6$  cells as per acclimation) and one was assigned to a caloric restriction (CR:  $\sim 1.4 \times 10^6$  cells) treatment, which is approximately 20% of the amount of food available to NF replicates. Each food treatment and genotype combination were replicated 24 times. Date of birth and date of death were recorded. They were otherwise maintained identically to the acclimation period.

## Survival Analysis

A Cox's proportional hazards model was used to test for differences in longevity between the two food treatments for all eight genotypes. This was done using the survival package in R (code used and model outputs: Supplementary File S1, clone longevity input data: Supplementary File S2). The response variable was days alive, with genotype, food treatment and their interaction (days alive = clone + food + clone\*food), as fixed effects. There was no censoring as all individuals were followed from their day of birth to the day of death. We present the results of the analysis of deviance (ANOVA) for the Cox's model which performs  $\chi^2$ -tests of likelihood ratios



of each model factor sequentially, which in this case was food followed by clone followed by the interaction between them.

## Material for RNA harvesting

Clone 32 (UK) (Auld, Hall, Housley Ochs, Sebastian, & Duffy, 2014) was selected for RNA sequencing because it showed a longevity response in the above experiment, and it shows clear maternal effects under variation in maternal food - larger offspring are produced under CR (Garbutt & Little, 2014, 2017). This clone was also the focus of more detailed analysis of food and longevity (Clark, Wilson, McNally and Little, *In revision*) where it again showed lifespan extension in response to food restriction. To generate RNA, maternal lines of C32 were first acclimatized for three generations in artificial pond medium at 20°C and on a 12h:12h light:dark cycle and fed  $2.5 \times 10^6$  cells of the single-celled green algae *Chlorella vulgaris* daily. The treatment generation [G<sub>0</sub> in (Hearn et al., 2018)] was then split into two groups of eight replicates paired by mother and fed either a normal diet of  $5 \times 10^6$  algal cells/day or a caloric restricted diet of  $1 \times 10^6$  algal cells/day per individual. Each replicate was formed of five *D. magna* reared in the same jar from birth.

After the birth of the first clutch of offspring in a replicate jar, the jar was treated for microbial contamination with tetracycline and ampicillin (as described in Hearn et al., 2018) over 24 hours, then *D. magna* individuals were homogenised in 700ul Qiazol Qiagen reagent ID: 79306), and stored at -70°C until further processed. RNA was extracted using miRNeasy mini kits (Qiagen Cat No./ID: 74106) and integrity and quality checked by Qubit (Thermo Fisher) fluorometer, nanodrop (Thermo Fisher) and Bioanalyzer (Agilent). No degradation was observed on Bioanalyzer total RNA

traces. Extractions were subsequently halved and one half was used to create small RNA libraries for miRNA expression analysed in (Hearn et al., 2018). TruSeq stranded mRNA-seq (Illumina, San Diego, USA) libraries were prepared by Edinburgh Genomics from the remaining RNA for eight normal food and caloric-restricted replicates as for the previous study. All libraries were multiplexed and sequenced on one lane of HiSeq 4000 to at a targeted depth of 15 million read-pairs per sample yielding a total of at least 290 million read-pairs. Raw sequencing data generated by this project was deposited in the European Nucleotide Archive under Bioproject PRJEB25137.

# **Differential gene expression and transcript usage analysis**

Reads were adapter and quality trimmed with Cutadapt (version 1.16, options: -q 15 --trim-n -m 36) (Martin, 2011) and then Trimmomatic (version 0.36, default options) (Bolger, Lohse, & Usadel, 2014) to remove remaining residual adapter sequence. Fastq files were inspected using FastQC (Andrews, 2010) before and after quality filtering to confirm the removal of adapter-derived and low-quality sequences and reports combined using multiQC (versions 1.8). We used a transcript-driven approach to quantify gene expression as (1) an excellent gene-set is available for *D. magna* (Orsini et al., 2016, 2018), (2) ‘alignment-free’ mapping approaches to transcripts are at least the equal of genome-based alignments for RNASeq (C. Zhang, Zhang, Lin, & Zhao, 2017), and (3) the *D. magna* genome is still in draft form with many genes overlapping and/or spread across multiple scaffolds. Gene expression per replicate was quantified using Salmon v0.13.1 (Patro, Duggal, Love, Irizarry, & Kingsford, 2017) with parameters “salmon quant --dumpEq --

validateMappings --rangeFactorizationBins 4 -l A --seqBias --gcBias" against the *D. magna* reference transcriptome (Orsini et al., 2016, 2018). The reference transcriptome was created by combining principal and alternative transcripts (downloaded from [http://arthropods.eugenesis.org/EvidentialGene/daphnia/daphnia\\_magna/Genes/early\\_access](http://arthropods.eugenesis.org/EvidentialGene/daphnia/daphnia_magna/Genes/early_access)) and indexed with a k-mer size of 25.

The salmon results were converted into a gene-by-replicate expression matrix for input to DESeq2 (Love, Huber, & Anders, 2014) with the R package tximport (Soneson, Love, & Robinson, 2015). Read mapping rates per replicate were taken from the resulting Salmon log files (Supplementary Table S1). Differential gene expression between caloric restriction and normal food replicates was tested using DESeq2, with 'mother' fit as a blocking factor (~ mother + condition). We incorporated log<sub>2</sub>-fold changes into our significance test and report genes significant at log<sub>2</sub>-fold change thresholds of 1, and 2 as this is more robust than post-hoc filtering of genes by log<sub>2</sub>-fold change alone. This method results in s-values for the non-zero log<sub>2</sub>-fold change analyses (i.e log<sub>2</sub>-fold change 1 and 2) which are analogous to q-values (Stephens, 2016; Zhu, Ibrahim, & Love, 2019). S-values are a measure of the chance that the sign (+ or -) of the log<sub>2</sub>-fold change for the gene is question is incorrect. We applied a significance threshold of 0.005 to the s-values as recommended by DESeq2 and apeglm (Zhu et al., 2019) package authors, as s-values are less conservative than q-values. We also performed significance testing without imposing a log<sub>2</sub>-fold change threshold (referred to as 0 log<sub>2</sub>-fold change) in DESeq2, with a q-value threshold of 0.05. We advise caution on the use of log<sub>2</sub>-fold change thresholds, however. Although they helped us to identify a general trend in the data, the method penalised high expression genes. This is because the variance

in gene-expression increases with the level of gene expression, meaning that high-expression genes have wider confidence intervals on their predicted  $\log_2$ -fold changes. Therefore, we also considered genes differentially expressed at  $\log_2$ -fold change 0 with overall expression of greater than 10,000 length-scaled transcript per million (TPM) when interpreting the results. Differential transcript usage (DTU) was tested in DRIMSeq (Nowicka & Robinson, 2016) and DEXSeq (Anders, Reyes, & Huber, 2012) and the overall false discovery rate (OFDR) for a two-step procedure (here referring to gene- and transcript-level) was calculated in stageR following (Love, Soneson, & Patro, 2018), with 'mother' fit as a blocking factor as for DESeq2. Only those genes that exhibited significant DTU in both DRIMSeq and DEXSeq after OFDR were considered further. Differential gene and transcript usage scripts are given in Supplementary File S1.

## **TopGO and gene set enrichment analysis**

Gene ontology term enrichment was tested in topGO (Alexa & Rahnenfuhrer, 2016) for each category of significant gene from gene- and transcript-level analyses using *D. magna* GO term annotations following (Hearn et al., 2018; Hearn, Pearson, et al., 2019). A conservative p-value threshold of 0.01 was applied with no multiple testing correction in line with topGO author recommendation (Section 6.2. The adjustment of p-values, topGO manual: <https://bioconductor.org/packages/release/bioc/html/topGO.html>). We considered enriched GO terms of the biological process (BP) and molecular function (MF) sub-categories for discussion. We clustered the significantly enriched GO terms in two-dimensional semantic space and treemaps of higher-order processes using REVIGO (Supek, Bošnjak, Škunca, & Šmuc, 2011) following

(Hearn, Blaxter, et al., 2019) to identify patterns in enrichment and reduce redundancy in GO terms. We adapted the REVIGO webserver-produced R-script for each category of enriched GO terms to combine groups of terms by colour according to the REVIGO treemap categories (R script, Supplementary File S1).

Gene set enrichment analysis (GSEA) of *D. magna* KEGG (Kyoto Encyclopedia of Genes and Genomes) orthologs (Kanehisa & Goto, 2000; Kanehisa, Sato, Kawashima, Furumichi, & Tanabe, 2015) was applied to identify KEGG gene pathways up- or down-regulated under CR. GSEA was run for all genes in the expression experiment using their log<sub>2</sub>-fold changes from the log<sub>2</sub>-fold change zero differential gene expression experiment. To obtain KEGG annotations for each gene the *D. magna* gene-set was annotated with trinotate (Haas et al., 2013) and gene-to-KEGG annotations were input to the universal enrichment protocol of clusterProfiler (Yu, Wang, Han, & He, 2012), a q-value cut-off of 0.05 was used to determine significance (R scripts: Supplementary File S1). We ran 1000 iterations of GSEA as the results were variable between runs and selected only those KEGG terms found significant in >95% of runs.

### **Interaction between expression level and differential methylation**

Average TPM gene expressions calculated in tximport and normalised in DESeq for CR and NF were correlated with the proportion of methylation within genes for the corresponding treatment using data taken from Hearn, Pearson, et al., (2019). Proportion methylated was defined as the count of methylated reads over the total reads at CpG sites within a genic region (exons + introns) aligned against from the

*D. magna* genome assembly (version 2.4) using Bismark (Krueger & Andrews, 2011), see Hearn, Pearson, et al., (2019) for further detail. Genic regions were defined from the *D. magna* reference annotation (downloaded from [http://arthropods.eugenesis.org/EvidentialGene/daphnia/daphnia\\_magna/Genes/early\\_access/dmagset7finloc9c.puban.gff.gz](http://arthropods.eugenesis.org/EvidentialGene/daphnia/daphnia_magna/Genes/early_access/dmagset7finloc9c.puban.gff.gz)). CpG counts for CR or NF were extracted by combining CpG counts of the six replicates per treatment from Hearn, Pearson, et al., (2019) from Bismark bam files. Average methylation rates within genic regions per treatment were calculated using bedtools (Quinlan & Hall, 2010). We then combined CpG averages with corresponding average TPM expression for each gene, calculated from the normalised Salmon count matrix. Genes that had expression greater than 10 TPM, at least 5% CpG methylation, and did not overlap another gene in *D. magna* annotation were retained for the correlation analysis. We applied Spearman's rho and Kendall's tau calculated in base R to the results, because of the lack of normality in the proportions of methylation and mean expression data. Furthermore, we intersected the list of differentially expressed genes at each log<sub>2</sub>-fold threshold and differential transcript usage with the differentially-methylated regions identified in response to CR from Hearn, Pearson, et al., (2019).

### **miRNA target prediction and mRNA-miRNA expression correlation**

MiRNA targets of differentially expressed miRNAs identified in Hearn et al., (2018) were predicted in the 3' untranslated regions (3' UTRs, following Graham & Barreto, 2019) of differentially expressed genes using PITA (Kertesz, Iovino, Unnerstall, Gaul, & Segal, 2007), RNAhybrid (Krüger & Rehmsmeier, 2006), miRanda (Enright et al.,

2003), MicroTar (Thadani & Tammi, 2006) and rna22 (Miranda et al., 2006) implemented on the tools4miRs platform (Lukasik, Wójcikowski, & Zielenkiewicz, 2016). Only those 3' UTRs predicted as targets by at least four programs were considered further. Pearson's correlation performed in miRLAB (Le, Zhang, Liu, Liu, & Li, 2015). The DESeq2 normalised count matrices for differentially expressed miRNAs from (Hearn et al., 2018) and mRNAs at log<sub>2</sub>-fold change 0 were supplied as input to miRLAB, and the results were intersected with the list of predicted miRNA to mRNA targets. MiRNA-mRNA pairs with greater than 0.5 or less than -0.5 correlation in expression level were considered further.

## Results

### Effect of CR on longevity

Cox's proportional hazards ANOVA (see Supplementary File S1 for R code and model output) of the survivorship data (Supplementary File S2) showed that CR *D. magna* lived longer on average than NF *D. magna* ( $\chi^2 = 13.26$ ,  $p = 0.0003$ ; Figure 1, part A). Clone 32 was one of the clones that demonstrated increased longevity under CR (Figure 1, Part B). Genotypes also differed in their lifespans ( $\chi^2 = 155.4$ ,  $p < 0.0001$ ), and there was a significant interaction between genotype and food level for differences in longevity (Figure 1;  $\chi^2 = 29.4$ ,  $p = 0.0001$ ).

### Expression experiment

A median of 23,365,302 read-pairs were sequenced per sample with a range of 21,452,900-26,752,873, and FastQC revealed no issues with read quality after

trimming (Supplementary Table S1: read filtering and alignment rates, Supplementary File S3: multiQC report). Read mapping rates of greater than 80% were recorded for all replicates, except one (3H2, normal food) that had a mapping rate of 74% (Supplementary Table S1). Similar differences in gene expression occur at the 0 log<sub>2</sub>-fold change analysis at 3345 up-regulated and 3064 down-regulated under CR (Table 1, Supplementary Tables S2-S4). This global response was reflected in principal components analysis of replicates (Figure 2), in which the first component explains 49% of the variance and separates all sample pairs by treatment. This was also true for miRNAs derived from the same RNA extractions (Hearn et al., 2018). However, with increasing log<sub>2</sub>-fold change thresholds there was a bias towards genes being up-regulated in CR (Table 1).

There were 75 genes with a mean expression greater than 10,000 TPM that were significant at the log<sub>2</sub>-fold change 0 threshold up-regulated in CR, versus 15 that were down-regulated. Four of the 15 genes down-regulated under CR were superoxide dismutases, including the most expressed gene (Dapma7bEVm009708) at a mean expression of 847468.627 TPM. This was over 6-fold greater than the next gene, a Vitellogenin-1 precursor (Dapma7bEVm014991) (Supplementary Table S5: gene descriptions and expression levels). Two further Vitellogenin-1 precursor genes were in the top five most expressed genes (Dapma7bEVm018415 and Dapma7bEVm029595), as was a di-domain hemoglobin precursor (Dapma7bEVm029622). By contrast, the gene lists for the log<sub>2</sub>-fold changes 1 and 2 were composed of genes at relatively modest expression levels and contained a high proportion of uncharacterised genes (Supplementary Table S5).



## Differential Transcript Usage and Hb related genes

For differential transcript usage, 498 transcripts corresponding to 294 genes were significant in the DEXSeq analysis and 327 transcripts from 187 genes for the DRIMSeq analysis. There was an overlap of 181 transcripts and 112 genes between the two methods (Supplementary File S4: DRIMSeq transcript expression levels for DTU significant genes). Of these, 32 genes have a mean gene expression normalised count level greater than 1000 TPM and five greater than 10000 TPM. The most highly-expressed DTU exhibiting gene was a di-domain haemoglobin precursor (Figure 3, Dapma7bEVm014981) with a TPM of 65,675. The isoform most abundant in CR replicates ("transcript 21", Figure 3) does not contain an erythrocrurin domain, whereas an isoform containing three such domains ("transcript 12", Figure 3), is down-regulated in CR. A further di-domain haemoglobin was also in this high expression group (Dapma7bEVm015367, TPM 13,532). Other notable examples of DTU included a Neurocalcin in which transcript 2 is heavily up-regulated in CR (Supplementary File S4: Dapma7bEVm018721), a Carboxypeptidase A4 (Dapma7bEVm015011), a Lactosylceramide (Dapma7bEVm007442), and an Ezrin-moesin-radixin (Dapma7bEVm009772).

Following from this result we found that one Hb trans-inducer HIF-1 $\alpha$  (Dapma7bEVm009543) was up-regulated significantly in CR (log<sub>2</sub>-fold change 0) at a mean expression of 6903 TPM versus 4558 in NF. Three of the HIF-1 co-dimer HIF-1 $\beta$  genes were DE at this threshold, the highest expressed gene was down-regulated in CR at a mean 2316 TPM versus 2667 in NF. The two other HIF-1 $\beta$  genes were up-regulated in CR, but had lower in average overall expression at 464

and 391 TPM respectively. An mTOR protein kinase (Dapma7bEVm000341) was also up-regulated under CR at log<sub>2</sub>-fold change 0 albeit with a modest log<sub>2</sub>-fold change overall (0.14) and mean expression of 2434 TPM.

## Gene ontology and gene set enrichment analyses

For molecular function GO term enrichment approximately equal numbers of terms at 20 and 21 significant terms up- and down-regulated at log<sub>2</sub>-fold change 0 respectively (Supplementary Table S6). Biological process GO terms differ in that 25 terms are enriched for genes down-regulated in CR at log<sub>2</sub>-fold change 0, versus 8 that were up-regulated (REVIGO clustering of GO terms, Figure 4 and Supplementary Table S7).

For the GSEA analysis of KEGG terms, five of the six enriched terms that occur in at least 95% of 1000 iterations were groups of genes up-regulated under CR (representative GSEA result, Figure 5). The five KEGG terms significantly enriched in CR were for serine/threonine-protein kinase/endoribonuclease IRE1 (K08852), preprotein translocase subunit SecA (K03070), serine/threonine-protein kinase/endoribonuclease IRE2 (K11715), chitinase (K01183) and cytochrome P450 family 4 (K15001). The single term enriched under normal food was for apolipoprotein D and lipocalin family protein (K03098).

## Overlap with differentially methylated regions

Over 2000 genes that met our criteria (i.e., expression greater than 10 and at least 5% methylation) were included in the correlations with CpG methylation rate for each of the NF and CR comparisons. Weak, significant and highly-concordant negative correlations were found for both comparisons for Kendall's tau and Spearman's rho (Supplementary File S5). Previously we identified 115 and 192 genes containing regions of hypo- or hypermethylated at CpG sites under CR respectively (Hearn, Pearson, et al., 2019). For both categories of methylation there was little signal of co-regulation with gene-expression. The majority of overlap occurs at the log<sub>2</sub>-fold 0 level for which thousands of genes were significantly up- and down-regulated under CR implying a high-degree of overlap by chance (Table 2). Only two genes up-regulated in CR with a log<sub>2</sub>-fold change of 1 or greater intersected with differentially methylated regions. One was an uncharacterised gene (Dapma7bEVm028334) which was identified as hypo-methylated under CR in Hearn, Pearson, et al., (2019), and the other an integral membrane protein (Dapma7bEVm027395) which was hyper-methylated under CR.

# **miRNA interaction**

In total 240 miRNA-mRNA pairs were predicted by the combined target-site method, which was composed of 117 genes and 34 miRNAs (miRNA-mRNA pairs and miRbase homologs: Supplementary Table S8). Many miRNAs were predicted by our combined approach to target multiple genes, hence the discrepancy between number of genes and miRNAs. As for the expression analyses these miRNA-mRNA pairs showed a bias toward genes expressed more highly under CR (Table 3). The strongest negative correlation for genes up-regulated in CR was -0.71 and the

strongest positive correlation was 0.87. There was little overlap between these genes and other genes of interest, but a Histone-lysine N-methyltransferase Suv4-20 (Dapma7bEVm018601, mean expression = 10277 TPM) up-regulated under CR had a negative correlation with nine miRNAs (Supplementary Table S8: gene description for gene numbers included in Table 3). Four of the genes exhibiting DTU were predicted to have miRNA targets, of these only a Para-nitrobenzyl esterase (Dapma7bEVm000405), was annotated.

## Discussion

Firstly, We established that CR has an effect on average lifespan across eight different genotypes of *D. magna*, in line with previous results (Garbutt & Little, 2014, 2017; Latta IV et al., 2011). Focussing on Clone 32 we explored the molecular basis of CR through difference in gene expression with normal food levels. This difference was global, as over 6000 genes respond to treatment (Table 1. Log-fold change 0). Differential methylation identified previously in response to CR in Clone 32 (Hearn, Pearson, et al., 2019) did not impact upon gene expression. The abundance of several miRNAs that respond to CR in Clone 32 (Hearn et al., 2018) correlated with gene expression, and these correlations were biased towards higher expression in the CR treatment. Generally, we showed that more genes are significantly up-regulated under CR (Table 1) and for the remainder of the discussion we focus on the responses of particular genes and pathways to CR.

## A haemoglobin response to CR in *D. magna*

Fewer genes had differential transcript usage detected than differential gene expression. This may reflect biological reality as the eight replicates per condition give reasonable power in DTU analyses (by comparison to simulated data in Love et al., 2018). Alternatively, this may be because we were conservative in our approach to filtering DTUs by only taking the union of DEXSeq and DRIMSeq. Gene isoforms may also be under-annotated, however the gene-set used as a reference results from a comprehensive bioinformatic construction after exposure of *D. magna* to twelve environmental stressors (Orsini et al., 2016).

DTU analysis identified a highly-expressed Hb gene that responded to CR by changing isoform proportions (Figure 3). We believe it is the first time haemoglobin genes have been implicated in CR in *D. magna*. This is concordant with the observed changing Hb protein levels in response to food (Fox et al., 1951). The gene involved, Dapma7bEVm014981, has many different isoforms with the three most highly expressed in this experiment exhibiting varied proportions of expression between CR and NF. Most strikingly, transcript 12, which encodes three erythrocrucorin (IPR002336) domains, occurs at much higher expression in NF than CR (Figure 3). These erythrocrucorin domain provides the scaffold for a Haem-binding pocket (<http://www.ebi.ac.uk/interpro/entry/InterPro/IPR002336/>) and hence oxygen affinity of the haemoglobin gene-product. Based on these results we hypothesise that *D. magna* moderates its haemoglobin mix in response to CR by reducing respiration leading to a lower proportion of haemoglobin containing erythrocrucorin domains under CR. This is evidenced by a change in the proportions of expressed isoforms of gene Dapma7bEVm014981 under CR in favour of isoforms without (transcript 21) an erythrocrucorin domain or two domains only (transcript 11).

Thus variation in erythrocrucorin domains could underly the observed correlation between oxygen-binding capacity and structurally distinct Hb-gene isoforms (Zeis, 2020). Future studies of Hb response to environmental stressors in *Daphnia* should consider differential isoform as well as Hb gene-copy usage following our insights here.

The Hb mix of *D. magna* is known to change in response to hypoxia due to the action of the dimeric hypoxia-inducible factor 1 (Cuenca Cambronero et al., 2018; Zeis, 2020). We identified that the HIF-1 $\alpha$  component of the Hb gene transcription factor HIF-1 is up-regulated in CR, as are two HIF-1 $\beta$  genes. However, the most highly-expressed HIF-1 $\beta$  is down-regulated in CR. The discordant patterns of HIF-1 component expression suggests HIF-1 regulation is not straightforward. Indeed, in *C. elegans* HIF-1 can promote or limit longevity (Leiser & Kaerberlein, 2010). The involvement of HIF-1 suggests a previously unidentified overlap in hypoxia and CR response in *Daphnia*. This may explain the similar phenotypic effects on body size in offspring under hypoxia and CR, with little associated impact on reproduction of CR and hypoxia (Garbutt & Little, 2017; Hearn et al., 2018; Seidl et al., 2005). It also indicates that the mTOR pathway is active in the *D. magna* response to CR (Land & Tee, 2007), which was supported here by up-regulation under CR of an mTOR protein kinase (Dapma7bEVm000341). An alternative to the HIF-1 induction pathway exists and it is triggered by juvenile hormone (Rider, Gorr, Olmstead, Wasilak, & LeBlanc, 2005). We did not see evidence for juvenile hormone involvement in the gene expression results, although this would require hormone assays to discard rigorously.

## **The endoplasmic reticulum stress response under CR**

The serine/threonine-protein kinase/endoribonuclease inositol-requiring enzyme 1 KEGG category (IRE1, K08852) was up-regulated under CR in clusterProfiler GSEA analysis (Figure 5). IRE1 is a sensor protein in the unfolded protein response (UPR) that lowers stress in the endoplasmic reticulum. When activated it initiates a transcription factor (X-box binding protein 1) that up-regulates endoplasmic reticulum associated degradation genes (ERAD) (Calfon et al., 2002). HIF-1 mediated CR lifespan increases in *C. elegans* depends on IRE1 (Di Chen & Kapahi, 2009). Transient CR-derived stress in *C. elegans* larvae causes a robust IRE1-dependent UPR to be maintained into adulthood, which is an example of hormesis (Matai et al., 2019). The up-regulation of IRE1 reported here links the CR response in *D. magna* to protein homeostasis in the ER, the dysregulation of which is strongly linked to ageing in general (Brown et al., 2014; Chadwick & Lajoie, 2019; Cohen, Bieschke, Perciavalle, Kelly, & Dillin, 2006; Steinkraus et al., 2008). This gene has further roles in CR in other organisms. It regulates the increased usage of intestinal triacylglycerol in *Drosophila* which mediates the metabolic adaptation of midgut epithelium to CR (Luis et al., 2016). While in mice the upregulation of IRE1 in response to a reduced protein diet protects against cancer (Rubio-Patiño et al., 2018).

## **Superoxide dismutase was down-regulated under CR**

Several of the well-known candidate response genes to CR were significantly up-regulated under CR, including sirtuins, IGF, and the mTOR protein kinase. None of these genes showed large differences in their mean expression and log<sub>2</sub>-fold changes were modest.

571

572 Copper-zinc super-oxide dismutase (SOD) was down-regulated under CR in *D.*  
 573 *magna*, it also showed varying responses to CR (or links to longevity) in other  
 574 systems such as yeast (Mesquita et al., 2010). Over-expression of copper-zinc and  
 575 manganese SOD in *Drosophila* did not increase lifespan (Orr, Mockett, Benes, &  
 576 Sohal, 2003), and in termites increased longevity of queens was associated with  
 577 enzyme activity and not expression level (Tasaki, Kobayashi, Matsuura, & Iuchi,  
 578 2018). The effect of SOD disruption on lifespan varies by experimental context in  
 579 *Drosophila* (Wang, Branicky, Noë, & Hekimi, 2018). In *D. magna* copper-zinc SOD is  
 580 known to increase in expression in response to copper, ammonia, and hypoxia levels  
 581 as they are considered to be general stress-response factors (Lyu, Zhu, Wang,  
 582 Chen, & Yang, 2013). We hypothesise that up-regulated SOD production under NF  
 583 was due to greater ROS production from higher-respiration levels than CR which  
 584 was compensated for by greater SOD expression. An alternative explanation is that  
 585 dissolved oxygen content was lowered in NF rearing jars by increased respiration-  
 586 levels versus CR jars leading to a hypoxia-induced stress-response known to occur  
 587 in *D. magna* and *D. pulex* in low oxygen conditions (Klumpen et al., 2017; Lyu et al.,  
 588 2013). This could also explain the Dapma7bEVm014981 Hb gene expressing  
 589 differential transcripts in response to hypoxia through oxygen-depletion in NF versus  
 590 CR.

591

592 **Several processes were repressed under CR**

593

594 Guanosine triphosphate (GTP) related molecular function GO terms dominated  
 595 enrichment in genes down-regulated under CR. The down-regulation of a GTPase



has a key role in life-extension due to CR in *C. elegans* (Hansen et al., 2008). This is hypothesized to stimulate recycling organelles and cytoplasmic proteins (autophagy), which promotes increased lifespans through down-stream mechanisms (Hansen et al., 2008).

Apolipoprotein D and other lipocalin genes (K03098) were down-regulated under CR. In *Drosophila* overexpression of Apolipoprotein D increased lifespan by 18% and tolerance to starvation, and could act as a scavenger of toxic products in defence against oxidative stress (Sanchez et al., 2006; Walker, Muffat, Rundel, & Benzer, 2006). Why this class of genes would be reduced in expression under CR in *D. magna* rather than up-regulated is unclear. Perhaps NF individuals are more developmentally advanced due to their rapid growth than CR individuals and are combating the effects of accumulated oxidative stress earlier in life.

# **A weak correlation between gene methylation and expression**

We observed a negative correlation between genes with a methylated CpG portion greater than 5% and gene expression. The highly concordant results for CR and NF comparisons indicate there is no effect of CR on this relationship. In *D. magna*, links between methylation and alternative splicing have been observed previously (Asselman et al., 2017; Kvist et al., 2018) and DNA methylation is enriched in gene-bodies. We saw no overlap between the DTU analysis and previously identified genes overlapping differentially methylated regions (DMRs), which is perhaps not surprising given the expression-methylation correlations between CR and NF expression and CpG methylation are essentially the same. These results contrast

with (Kvist et al., 2018) in which methylation at exons two to four exhibits significant positive correlations with gene expression in *D. magna*. Our focus on the response to a treatment differs from Kvist et al., (2018) which defined the evolutionary conservation of methylation across gene bodies in *D. magna*.

## **miRNA correlations are biased towards CR**

A robust miRNA response was observed to CR in Hearn et al., (2018) originating from the same total RNA samples included in this study. Here we observed greater miRNA targeting of genes up-regulated in CR at log<sub>2</sub>-fold change 0 for both positive and negative correlations (33 in each case, Table 3). This is in keeping with the general bias towards up-regulation in CR across this experiment; we do not see overlap in the miRNA correlated gene-lists with Hb-related genes or SOD discussed above. Of note, there is a negative correlation between nine miRNAs and Histone-lysine N-methyltransferase Suv4-20 (Dapma7bEVm018601). This gene is significantly up-regulated at log<sub>2</sub>-fold change 1 under CR (average TPM 15063 versus 5278 in NF). Suv4-20 trimethylates histone H4 lysine 20 and has an important role in DNA repair and genomic stability (Jørgensen, Schotta, & Sørensen, 2013). However, we must interpret the results with caution as computational miRNA-mRNA target inference is prone to false-positives (Fridrich, Hazan, & Moran, 2019; Pinzón et al., 2017). This is because animal miRNA seed binding is ‘wobbly’ and does not require perfect complementarity between miRNA and mRNA. Because of this, Fridrich et al., (2019) recommend biological interpretation only when further experimental support is available. This included when taking the overlap of multiple prediction programs as we have done.

Demonstrating that an mRNA is regulated by specific miRNAs will require the development of a crosslinking, ligation and sequencing of hybrids (CLASH) protocol for the *D. magna* Argonaute (AGO) proteins (Helwak, Kudla, Dudnakova, & Tollervey, 2013). The CLASH method isolates the AGO-miRNA-mRNA complexes that form during mRNA silencing by miRNA. Sequencing of the interacting RNA in the AGO protein can then be used to identify which miRNAs are bound to what mRNAs under the experimental condition surveyed. Even if the link between miRNA targeting and Suv4-20 is not borne out in future such experiments, the differential expression result indicates a potential link between CR, the histone epigenome, and DNA repair.

## Conclusions

We first showed that caloric restriction increases the lifespan of *D. magna* across multiple genotypes. We then chose a CR-responsive genotype to survey the transcriptome of young-adults after their first clutch and detected a number of canonical stress- and CR responses. By contrasting differential transcript usage between CR and NF we also showed that the haemoglobin isoform mix of a highly-expressed *D. magna* Hb gene is reduced for isoforms containing erythrocrurin domains. We speculate that this may reduce the overall respiration-levels of CR individuals and partially explain the observed increased lifespan under CR. Components of the transcription factor that controls Hb-gene transcription, HIF-1, are also differentially expressed linking the response to hypoxia with that for CR. An mTOR protein kinase is also differentially expressed and is known to modulate HIF-1. The mTOR pathway is implicated in CR responses of diverse organisms, which is also the case in *D. magna*. Future work should test if respiration is depressed under

CR through changes to the haemoglobin mix in *D. magna*, and if this response is conserved in non-aquatic organisms.

## Acknowledgements

This research was funded by the Wellcome Trust Institutional Strategic Support Fund (Round 2, University of Edinburgh). The funder was not involved in study design, and collection, analysis, or interpretation of data and in writing the manuscript.

## References

- [dataset]Hearn, J., Clark, J., Wilson, P.J., & Little, T.J.; 2019; Differential expression in response to caloric restriction in *Daphnia magna*; European Nucleotide Archive; PRJEB25137.
- Alexa, A., & Rahnenfuhrer, J. (2016). topGO: Enrichment Analysis for Gene Ontology. Available at: <https://bioconductor.org/packages/release/bioc/html/topGO.html>.
- Anders, S., Reyes, A., & Huber, W. (2012). Detecting differential usage of exons from RNA-seq data. *Genome Res*, 22. doi:10.1101/gr.133744.111
- Andrews, S. (2010). FastQC: A quality control application for high throughput sequence data. Available at: <http://www.bioinformatics.babraham.ac.uk/projects/fastqc>.
- Asselman, J., Coninck, D. I. M. De, Beert, E., Janssen, C. R., Orsini, L., Pfrender, M. E., ... Schamphelaere, K. A. C. De. (2017). Bisulfite Sequencing with *Daphnia* Highlights a Role for Epigenetics in Regulating Stress Response to Microcystis through Preferential Differential Methylation of Serine and Threonine Amino Acids. *Environmental Science & Technology*, 51(2), 924–931. doi:10.1021/acs.est.6b03870
- Auld, S. K. J. R., Hall, S. R., Housley Ochs, J., Sebastian, M., & Duffy, M. A. (2014). Predators and patterns of within-host growth can mediate both among-host competition and evolution of transmission potential of parasites. *The American Naturalist*, 184(S1), S77–S90.
- Boersma, M., Spaak, P., & De Meester, L. (1998). Predator-mediated plasticity in morphology, life history, and behavior of *Daphnia*: the uncoupling of responses. *The American Naturalist*, 152(2), 237–248.
- Bolger, A. M., Lohse, M., & Usadel, B. (2014). Trimmomatic: A flexible trimmer for Illumina sequence data. *Bioinformatics*, 30(15), 2114–2120. doi:10.1093/bioinformatics/btu170
- Brown, M. K., Chan, M. T., Zimmerman, J. E., Pack, A. I., Jackson, N. E., & Naidoo, N. (2014). Aging induced endoplasmic reticulum stress alters sleep and sleep homeostasis. *Neurobiology of Aging*, 35(6), 1431–1441. doi:10.1016/j.neurobiolaging.2013.12.005

- 708 Calfon, M., Zeng, H., Urano, F., Till, J. H., Hubbard, S. R., Harding, H. P., ... Ron, D.  
709 (2002). IRE1 couples endoplasmic reticulum load to secretory capacity by  
710 processing the XBP-1 mRNA. *Nature*, 415(6867), 92–96.
- 711 Chadwick, S. R., & Lajoie, P. (2019). Endoplasmic Reticulum Stress Coping  
712 Mechanisms and Lifespan Regulation in Health and Diseases. *Frontiers in Cell*  
713 *and Developmental Biology*, 7, 84. doi:10.3389/fcell.2019.00084
- 714 Choi, K.-M., Hong, S.-J., van Deursen, J. M., Kim, S., Kim, K. H., & Lee, C.-K.  
715 (2018). Caloric restriction and rapamycin differentially alter energy metabolism  
716 in yeast. *The Journals of Gerontology: Series A*, 73(1), 29–38.
- 717 Cohen, E., Bieschke, J., Perciavalle, R. M., Kelly, J. W., & Dillin, A. (2006). Opposing  
718 activities protect against age-onset proteotoxicity. *Science*, 313(5793), 1604–  
719 1610.
- 720 Colbourne, J. K., Pfrender, M. E., Gilbert, D., Thomas, W. K., Tucker, A., Oakley, T.  
721 H., ... others. (2011). The ecoresponsive genome of *Daphnia pulex*. *Science*,  
722 331(6017), 555–561.
- 723 Cuenca Cambroner, M., Zeis, B., & Orsini, L. (2018). Haemoglobin-mediated  
724 response to hyper-thermal stress in the keystone species *Daphnia magna*.  
725 *Evolutionary Applications*, 11(1), 112–120.
- 726 Di Chen, E. L. T., & Kapahi, P. (2009). HIF-1 modulates dietary restriction-mediated  
727 lifespan extension via IRE-1 in *Caenorhabditis elegans*. *PLoS Genetics*, 5(5).
- 728 Ding, F., Gil, M. P., Franklin, M., Ferreira, J., Tatar, M., Helfand, S. L., & Neretti, N.  
729 (2014). Transcriptional response to dietary restriction in *Drosophila*  
730 *melanogaster*. *Journal of Insect Physiology*, 69(C), 101–106.  
731 doi:10.1016/j.jinsphys.2014.05.002
- 732 Dobson, A. J., He, X., Blanc, E., Bolukbasi, E., Feseha, Y., Yang, M., & Piper, M. D.  
733 W. (2018). Tissue-specific transcriptome profiling of *Drosophila* reveals roles for  
734 GATA transcription factors in longevity by dietary restriction. *Npj Aging and*  
735 *Mechanisms of Disease*, 4(1), 5. doi:10.1038/s41514-018-0024-4
- 736 Enright, A. J., John, B., Gaul, U., Tuschl, T., Sander, C., & Marks, D. S. (2003).  
737 MicroRNA targets in *Drosophila*. *Genome Biology*, 5(1), R1. doi:10.1186/gb-  
738 2003-5-1-r1
- 739 Fox, H. M., Gilchrist, B. M., & Phear, E. A. (1951). Functions of haemoglobin in  
740 *Daphnia*. *Proceedings of the Royal Society of London. Series B-Biological*  
741 *Sciences*, 138(893), 514–528.
- 742 Fridrich, A., Hazan, Y., & Moran, Y. (2019). Too Many False Targets for MicroRNAs:  
743 Challenges and Pitfalls in Prediction of miRNA Targets and Their Gene  
744 Ontology in Model and Non-model Organisms. *Bioessays*, 41(4), 1800169.
- 745 Garbutt, J. S., & Little, T. J. (2014). Maternal food quantity affects offspring feeding  
746 rate in *Daphnia magna*. *Biology Letters*, 10(7), 20140356.
- 747 Garbutt, J. S., & Little, T. J. (2017). Bigger is better: changes in body size explain a  
748 maternal effect of food on offspring disease resistance. *Ecology and Evolution*,  
749 7(5), 1403–1409.
- 750 Gerke, P., Börding, C., Zeis, B., & Paul, R. J. (2011). Adaptive haemoglobin gene  
751 control in *Daphnia pulex* at different oxygen and temperature conditions.  
752 *Comparative Biochemistry and Physiology Part A: Molecular & Integrative*  
753 *Physiology*, 159(1), 56–65.
- 754 Gladyshev, V. N. (2014). The free radical theory of aging is dead. Long live the  
755 damage theory! *Antioxidants & Redox Signaling*, 20(4), 727–731.  
756 doi:10.1089/ars.2013.5228
- 757 Gorr, T. A., Cahn, J. D., Yamagata, H., & Bunn, H. F. (2004). Hypoxia-induced

758 synthesis of hemoglobin in the crustacean *Daphnia magna* is hypoxia-inducible  
759 factor-dependent. *Journal of Biological Chemistry*, 279(34), 36038–36047.

760 Graham, A. M., & Barreto, F. S. (2019). Novel microRNAs are associated with  
761 population divergence in transcriptional response to thermal stress in an  
762 intertidal copepod. *Molecular Ecology*, 28(3), 584–599.

763 Haas, B. J., Papanicolaou, A., Yassour, M., Grabherr, M., Blood, P. D., Bowden, J.,  
764 ... Regev, A. (2013). *De novo* transcript sequence reconstruction from RNA-seq  
765 using the Trinity platform for reference generation and analysis. *Nat. Protocols*,  
766 8(8), 1494–1512.

767 Hansen, M., Chandra, A., Mitic, L. L., Onken, B., Driscoll, M., & Kenyon, C. (2008). A  
768 role for autophagy in the extension of lifespan by dietary restriction in *C.*  
769 *elegans*. *PLoS Genetics*, 4(2), e24.

770 Hearn, J., Blaxter, M., Schönrogge, K., Nieves-Aldrey, J.-L., Pujade-Villar, J.,  
771 Huguet, E., ... Stone, G. N. (2019). Genomic dissection of an extended  
772 phenotype: Oak galling by a cynipid gall wasp. *PLoS Genetics*, 15(11),  
773 e1008398–e1008398. doi:10.1371/journal.pgen.1008398

774 Hearn, J., Chow, F. W.-N., Barton, H., Tung, M., Wilson, P., Blaxter, M., ... Little, T.  
775 J. (2018). *Daphnia magna* microRNAs respond to nutritional stress and ageing  
776 but are not transgenerational. *Molecular Ecology*, 27(6), 1402–1412.

777 Hearn, J., Pearson, M., Blaxter, M., Wilson, P. J., & Little, T. J. (2019). Genome-wide  
778 methylation is modified by caloric restriction in *Daphnia magna*. *BMC Genomics*,  
779 20(1), 197. doi:10.1186/s12864-019-5578-4

780 Heilbronn, L. K., & Ravussin, E. (2003). Calorie restriction and aging: review of the  
781 literature and implications for studies in humans. *The American Journal of*  
782 *Clinical Nutrition*, 78(3), 361–369.

783 Heintz, C., Doktor, T. K., Lanjuin, A., Escoubas, C., Zhang, Y., Weir, H. J., ... Mair,  
784 W. B. (2017). Splicing factor 1 modulates dietary restriction and TORC1  
785 pathway longevity in *C. elegans*. *Nature*, 541(7635), 102–106.  
786 doi:10.1038/nature20789

787 Helwak, A., Kudla, G., Dudnakova, T., & Tollervey, D. (2013). Mapping the human  
788 miRNA interactome by CLASH reveals frequent noncanonical binding. *Cell*,  
789 153(3), 654–665.

790 Johnson, S. C., Rabinovitch, P. S., & Kaeberlein, M. (2013). mTOR is a key  
791 modulator of ageing and age-related disease. *Nature*, 493(7432), 338–345.  
792 doi:10.1038/nature11861

793 Jørgensen, S., Schotta, G., & Sørensen, C. S. (2013). Histone H4 lysine 20  
794 methylation: key player in epigenetic regulation of genomic integrity. *Nucleic*  
795 *Acids Research*, 41(5), 2797–2806.

796 Kanehisa, M., & Goto, S. (2000). KEGG: kyoto encyclopedia of genes and genomes.  
797 *Nucleic Acids Research*, 28(1), 27–30.

798 Kanehisa, M., Sato, Y., Kawashima, M., Furumichi, M., & Tanabe, M. (2015). KEGG  
799 as a reference resource for gene and protein annotation. *Nucleic Acids*  
800 *Research*, 44(D1), D457–D462.

801 Kapahi, P., Kaeberlein, M., & Hansen, M. (2017). Dietary restriction and lifespan:  
802 Lessons from invertebrate models. *Ageing Research Reviews*, 39, 3–14.  
803 doi:10.1016/j.arr.2016.12.005

804 Kenyon, C. J. (2010). The genetics of ageing. *Nature*, 464(7288), 504–512.  
805 doi:10.1038/nature08980

806 Kertesz, M., Iovino, N., Unnerstall, U., Gaul, U., & Segal, E. (2007). The role of site  
807 accessibility in microRNA target recognition. *Nature Genetics*, 39(10), 1278–



1284.

Kim, S.-S., Choi, K.-M., Kim, S., Park, T., Cho, I.-C., Lee, J.-W., & Lee, C.-K. (2016). Whole-transcriptome analysis of mouse adipose tissue in response to short-term caloric restriction. *Molecular Genetics and Genomics*, 291(2), 831–847. doi:10.1007/s00438-015-1150-3

Klumpen, E., Hoffschroer, N., Zeis, B., Gigengack, U., Dohmen, E., & Paul, R. J. (2017). Reactive oxygen species (ROS) and the heat stress response of *Daphnia pulex*: ROS-mediated activation of hypoxia-inducible factor 1 (HIF-1) and heat shock factor 1 (HSF-1) and the clustered expression of stress genes. *Biology of the Cell*, 109(1), 39–64.

Koubova, J., & Guarente, L. (2003). How does calorie restriction work? *Genes & Development*, 17(3), 313–321.

Krueger, F., & Andrews, S. R. (2011). Bismark: a flexible aligner and methylation caller for Bisulfite-Seq applications. *Bioinformatics*, 27(11), 1571–1572.

Krüger, J., & Rehmsmeier, M. (2006). RNAhybrid: microRNA target prediction easy, fast and flexible. *Nucleic Acids Research*, 34(suppl\_2), W451–W454.

Kvist, J., Gonçalves Athanásio, C., Shams Solari, O., Brown, J. B., Colbourne, J. K., Pfreder, M. E., & Mirbahai, L. (2018). Pattern of DNA Methylation in *Daphnia*: Evolutionary Perspective. *Genome Biology and Evolution*, 10(8), 1988–2007. doi:10.1093/gbe/evy155

Lai, K.-P., Li, J.-W., Chan, C. Y.-S., Chan, T.-F., Yuen, K. W.-Y., & Chiu, J. M.-Y. (2016). Transcriptomic alterations in *Daphnia magna* embryos from mothers exposed to hypoxia. *Aquatic Toxicology*, 177, 454–463.

Lakowski, B., & Hekimi, S. (1998). The genetics of caloric restriction in *Caenorhabditis elegans*. *Proceedings of the National Academy of Sciences of the United States of America*, 95(22), 13091–13096. doi:10.1073/pnas.95.22.13091

Lampert, W. (1987). Feeding and nutrition in *Daphnia*. In R. H. Peters & R. De Bernardi (Eds.), *Daphnia* (p. 502). Men. Ist. Ital. Idrobiol.

Land, S. C., & Tee, A. R. (2007). Hypoxia-inducible factor 1 $\alpha$  is regulated by the mammalian target of rapamycin (mTOR) via an mTOR signaling motif. *Journal of Biological Chemistry*, 282(28), 20534–20543.

Latta IV, L. C., Frederick, S., & Pfreder, M. E. (2011). Diet restriction and life history trade-offs in short-and long-lived species of *Daphnia*. *Journal of Experimental Zoology Part A: Ecological Genetics and Physiology*, 315(10), 610–617.

Le, T. D., Zhang, J., Liu, L., Liu, H., & Li, J. (2015). MiRLAB: An R based dry lab for exploring miRNA-mRNA regulatory relationships. *PLoS ONE*, 10(12), 1–15. doi:10.1371/journal.pone.0145386

Lee, S.-J., Hwang, A. B., & Kenyon, C. (2010). Inhibition of respiration extends *C. elegans* life span via reactive oxygen species that increase HIF-1 activity. *Current Biology*, 20(23), 2131–2136.

Leiser, S. F., & Kaeberlein, M. (2010). The hypoxia-inducible factor HIF-1 functions as both a positive and negative modulator of aging. *Biological Chemistry*, 391(10), 1131–1137.

Love, M. I., Huber, W., & Anders, S. (2014). Moderated estimation of fold change and dispersion for RNA-seq data with DESeq2. *Genome Biology*, 15(12), 550. doi:10.1186/s13059-014-0550-8

Love, M. I., Sonesson, C., & Patro, R. (2018). Swimming downstream: statistical analysis of differential transcript usage following Salmon quantification. *F1000Research*, 7.

- 858 Luis, N. M., Wang, L., Ortega, M., Deng, H., Katewa, S. D., Li, P. W.-L., ... Kapahi,  
859 P. (2016). Intestinal IRE1 is required for increased triglyceride metabolism and  
860 longer lifespan under dietary restriction. *Cell Reports*, 17(5), 1207–1216.
- 861 Lukasik, A., Wójcikowski, M., & Zielenkiewicz, P. (2016). Tools4miRs – one place to  
862 gather all the tools for miRNA analysis. *Bioinformatics*, 32(17), 2722–2724.  
863 doi:10.1093/bioinformatics/btw189
- 864 Lyu, K., Wang, Q., Li, Z., Chen, R., Zhu, C., Liu, J., & Yang, Z. (2015). Age-  
865 dependent survival and selected gene expression in *Daphnia magna* after short-  
866 term exposure to low dissolved oxygen. *Journal of Plankton Research*, 37(1),  
867 66–74.
- 868 Lyu, K., Zhu, X., Wang, Q., Chen, Y., & Yang, Z. (2013). Copper/Zinc Superoxide  
869 Dismutase from the Cladoceran *Daphnia magna*: Molecular Cloning and  
870 Expression in Response to Different Acute Environmental Stressors.  
871 *Environmental Science & Technology*, 47(15), 8887–8893.  
872 doi:10.1021/es4015212
- 873 Martin, M. (2011). Cutadapt removes adapter sequences from high-throughput  
874 sequencing reads. *EMBnet.Journal*, 17(1).
- 875 Matai, L., Sarkar, G. C., Chamoli, M., Malik, Y., Kumar, S. S., Rautela, U., ...  
876 Mukhopadhyay, A. (2019). Dietary restriction improves proteostasis and  
877 increases life span through endoplasmic reticulum hormesis. *Proceedings of the*  
878 *National Academy of Sciences*, 116(35), 17383 LP – 17392.  
879 doi:10.1073/pnas.1900055116
- 880 Matthews, D., Diskin, M. G., Kenny, D. A., Creevey, C. J., Keogh, K., & Waters, S.  
881 M. (2017). Effect of short term diet restriction on gene expression in the bovine  
882 hypothalamus using next generation RNA sequencing technology. *BMC*  
883 *Genomics*, 18(1), 1–14. doi:10.1186/s12864-017-4265-6
- 884 Mesquita, A., Weinberger, M., Silva, A., Sampaio-Marques, B., Almeida, B., Leão,  
885 C., ... Ludovico, P. (2010). Caloric restriction or catalase inactivation extends  
886 yeast chronological lifespan by inducing H<sub>2</sub>O<sub>2</sub> and superoxide dismutase  
887 activity. *Proceedings of the National Academy of Sciences*, 107(34), 15123 LP –  
888 15128. doi:10.1073/pnas.1004432107
- 889 Miranda, K. C., Huynh, T., Tay, Y., Ang, Y.-S., Tam, W.-L., Thomson, A. M., ...  
890 Rigoutsos, I. (2006). A pattern-based method for the identification of MicroRNA  
891 binding sites and their corresponding heteroduplexes. *Cell*, 126(6), 1203–1217.
- 892 Mitchell, S. E., & Lampert, W. (2000). Temperature adaptation in a geographically  
893 widespread zooplankter, *Daphnia magna*. *Journal of Evolutionary Biology*,  
894 13(3), 371–382.
- 895 Most, J., Tosti, V., Redman, L. M., & Fontana, L. (2017). Calorie restriction in  
896 humans: An update. *Ageing Research Reviews*, 39, 36–45.  
897 doi:10.1016/j.arr.2016.08.005
- 898 Muid, K. A., Karakaya, H. Ç., & Koc, A. (2014). Absence of superoxide dismutase  
899 activity causes nuclear DNA fragmentation during the aging process.  
900 *Biochemical and Biophysical Research Communications*, 444(2), 260–263.
- 901 Muller, F. L., Song, W., Liu, Y., Chaudhuri, A., Piek-Dahl, S., Strong, R., ... others.  
902 (2006). Absence of CuZn superoxide dismutase leads to elevated oxidative  
903 stress and acceleration of age-dependent skeletal muscle atrophy. *Free Radical*  
904 *Biology and Medicine*, 40(11), 1993–2004.
- 905 Nowicka, M., & Robinson, M. D. (2016). DRIMSeq: a Dirichlet-multinomial framework  
906 for multivariate count outcomes in genomics. *F1000Research*, 5.
- 907 Oka, S., Hirai, J., Yasukawa, T., Nakahara, Y., & Inoue, Y. H. (2015). A correlation of



- 908 reactive oxygen species accumulation by depletion of superoxide dismutases
- 909 with age-dependent impairment in the nervous system and muscles of
- 910 *Drosophila* adults. *Biogerontology*, 16(4), 485–501.
- 911 Orr, W. C., Mockett, R. J., Benes, J. J., & Sohal, R. S. (2003). Effects of
- 912 Overexpression of Copper-Zinc and Manganese Superoxide Dismutases,
- 913 Catalase, and Thioredoxin Reductase Genes on Longevity in *Drosophila*
- 914 *melanogaster*. *Journal of Biological Chemistry*, 278(29), 26418–26422.
- 915 doi:10.1074/jbc.M303095200
- 916 Orsini, L., Brown, J. B., Shams Solari, O., Li, D., He, S., Podicheti, R., ... others.
- 917 (2018). Early transcriptional response pathways in *Daphnia magna* are
- 918 coordinated in networks of crustacean-specific genes. *Molecular Ecology*, 27(4),
- 919 886–897.
- 920 Orsini, L., Gilbert, D., Podicheti, R., Jansen, M., Brown, J. B., Solari, O. S., ...
- 921 Frilander, M. J. (2016). *Daphnia magna* transcriptome by RNA-Seq across 12
- 922 environmental stressors. *Scientific Data*, 3, 160030.
- 923 Patro, R., Duggal, G., Love, M. I., Irizarry, R. A., & Kingsford, C. (2017). Salmon
- 924 provides fast and bias-aware quantification of transcript expression. *Nature*
- 925 *Methods*, 14(4), 417–419. doi:10.1038/nmeth.4197
- 926 Pinzón, N., Li, B., Martinez, L., Sergeeva, A., Presumey, J., Apparailly, F., & Seitz,
- 927 H. (2017). microRNA target prediction programs predict many false positives.
- 928 *Genome Research*, 27(2), 234–245.
- 929 Quinlan, A. R., & Hall, I. M. (2010). BEDTools: a flexible suite of utilities for
- 930 comparing genomic features. *Bioinformatics*, 26(6), 841–842.
- 931 doi:10.1093/bioinformatics/btq033
- 932 Redman, L. M., & Ravussin, E. (2011). Caloric restriction in humans: impact on
- 933 physiological, psychological, and behavioral outcomes. *Antioxidants & Redox*
- 934 *Signaling*, 14(2), 275–287.
- 935 Regan, J. C., Khericha, M., Dobson, A. J., Bolukbasi, E., Rattanavirotkul, N., &
- 936 Partridge, L. (2016). Sex difference in pathology of the ageing gut mediates the
- 937 greater response of female lifespan to dietary restriction. *Elife*, 5, e10956.
- 938 Rider, C. V., Gorr, T. A., Olmstead, A. W., Wasilak, B. A., & LeBlanc, G. A. (2005).
- 939 Stress signaling: coregulation of hemoglobin and male sex determination
- 940 through a terpenoid signaling pathway in a crustacean. *Journal of Experimental*
- 941 *Biology*, 208(1), 15 LP – 23. doi:10.1242/jeb.01343
- 942 Rubio-Patiño, C., Bossowski, J. P., De Donatis, G. M., Mondragón, L., Villa, E., Aira,
- 943 L. E., ... others. (2018). Low-protein diet induces IRE1α-dependent anticancer
- 944 immunosurveillance. *Cell Metabolism*, 27(4), 828–842.
- 945 Russell, S. J., & Kahn, C. R. (2007). Endocrine regulation of ageing. *Nature Reviews*
- 946 *Molecular Cell Biology*, 8(9), 681.
- 947 Sanchez, D., López-Arias, B., Torroja, L., Canal, I., Wang, X., Bastiani, M. J., &
- 948 Ganfornina, M. D. (2006). Loss of glial lazaro, a homolog of apolipoprotein D,
- 949 reduces lifespan and stress resistance in *Drosophila*. *Current Biology*, 16(7),
- 950 680–686.
- 951 Seidl, M. D., Paul, R. J., & Pirow, R. (2005). Effects of hypoxia acclimation on
- 952 morpho-physiological traits over three generations of *Daphnia magna*. *Journal of*
- 953 *Experimental Biology*, 208(11), 2165–2175.
- 954 Sohal, R. S., & Weindruch, R. (1996). Oxidative Stress, Caloric Restriction, and
- 955 Aging. *Science*, 273(5271), 59–63.
- 956 Sonesson, C., Love, M. I., & Robinson, M. D. (2015). Differential analyses for RNA-
- 957 seq: transcript-level estimates improve gene-level inferences. *F1000Research*,

- 4.
- Steinkraus, K. A., Smith, E. D., Davis, C., Carr, D., Pendergrass, W. R., Sutphin, G. L., ... Kaeberlein, M. (2008). Dietary restriction suppresses proteotoxicity and enhances longevity by an hsf-1-dependent mechanism in *Caenorhabditis elegans*. *Aging Cell*, 7(3), 394–404.
- Stephens, M. (2016). False discovery rates: a new deal. *Biostatistics*, 18(2), 275–294.
- Supek, F., Bošnjak, M., Škunca, N., & Šmuc, T. (2011). REVIGO summarizes and visualizes long lists of gene ontology terms. *PloS One*, 6(7), e21800.
- Tasaki, E., Kobayashi, K., Matsuura, K., & Iuchi, Y. (2018). Long-lived termite queens exhibit high Cu/Zn-superoxide dismutase activity. *Oxidative Medicine and Cellular Longevity*, 2018.
- Thadani, R., & Tammi, M. T. (2006). MicroTar: predicting microRNA targets from RNA duplexes. In *BMC bioinformatics* (Vol. 7, p. S20).
- Vigne, P., & Frelin, C. (2006). A low protein diet increases the hypoxic tolerance in *Drosophila*. *PLoS One*, 1(1).
- Walford, R. L., Harris, S. B., & Weindruch, R. (1987). Dietary restriction and aging: historical phases, mechanisms and current directions. *The Journal of Nutrition*, 117(10), 1650–1654.
- Walker, D. W., Muffat, J., Rundel, C., & Benzer, S. (2006). Overexpression of a *Drosophila* homolog of apolipoprotein D leads to increased stress resistance and extended lifespan. *Current Biology*, 16(7), 674–679.
- Wang, Y., Branicky, R., Noë, A., & Hekimi, S. (2018). Superoxide dismutases: Dual roles in controlling ROS damage and regulating ROS signaling. *The Journal of Cell Biology*, 217(6), 1915 LP – 1928. doi:10.1083/jcb.201708007
- Wood, S. H., Dam, S., Craig, T., Tacutu, R., O'Toole, A., Merry, B. J., & de Magalhães, J. P. (2015). Transcriptome analysis in calorie-restricted rats implicates epigenetic and post-translational mechanisms in neuroprotection and aging. *Genome Biology*, 16(1), 285.
- Yu, G., Wang, L.-G., Han, Y., & He, Q.-Y. (2012). clusterProfiler: an R package for comparing biological themes among gene clusters. *Omics: A Journal of Integrative Biology*, 16(5), 284–287.
- Zeis, B. (2020). Hemoglobin in Arthropods-*Daphnia* as a Model. In U. Hoeger & J. R. Harris (Eds.), *Vertebrate and Invertebrate Respiratory Proteins, Lipoproteins and other Body Fluid Proteins* (pp. 163–194). Cham: Springer International Publishing. doi:10.1007/978-3-030-41769-7\_6
- Zeis, B., Becher, B., Goldmann, T., Clark, R., Vollmer, E., Bölke, B., ... others. (2003). Differential haemoglobin gene expression in the crustacean *Daphnia magna* exposed to different oxygen partial pressures. *Biological Chemistry*, 384(8), 1133–1145.
- Zhang, C., Zhang, B., Lin, L.-L., & Zhao, S. (2017). Evaluation and comparison of computational tools for RNA-seq isoform quantification. *BMC Genomics*, 18(1), 583.
- Zhang, Y., Shao, Z., Zhai, Z., Shen, C., & Powell-Coffman, J. A. (2009). The HIF-1 hypoxia-inducible factor modulates lifespan in *C. elegans*. *PloS One*, 4(7).
- Zhu, A., Ibrahim, J. G., & Love, M. I. (2019). Heavy-tailed prior distributions for sequence count data: removing the noise and preserving large differences. *Bioinformatics*, 35(12), 2084–2092.

**Data Accessibility**

Raw read data generated for this study has been deposited in the European Nucleotide Archive, Bioproject PRJEB25137.

**Author Contributions**

JH and TJL designed this research and wrote the paper. JH, TJL, PJW and JC performed research. PJW and JC maintained *D. magna* genotypes used in this study.

**Tables**

**Table 1. Significantly differentially expressed genes at each log<sub>2</sub>-fold change threshold.** More genes were up-regulated in CR replicates.

|                |       | Log <sub>2</sub> -fold change<br>0 | Log <sub>2</sub> -fold change<br>>1 | Log <sub>2</sub> -old change<br>>2 |
|----------------|-------|------------------------------------|-------------------------------------|------------------------------------|
| Up-regulated   | in CR | 3345                               | 280                                 | 62                                 |
| Down-regulated | in CR | 3063                               | 52                                  | 11                                 |

**Table 2. Overlap between significantly expressed genes at log<sub>2</sub>-fold change 0 and hypo- or hyper-methylated genes.** Percentages were calculated from total hypo- and hyper-methylated genes.

|                  | Up-regulated in CR | Down-regulated in CR |
|------------------|--------------------|----------------------|
| Hypo-methylated  | 20 (10%)           | 48 (25%)             |
| Hyper-methylated | 16 (14%)           | 28 (24%)             |

**Table 3. Overlap between significantly expressed genes at log<sub>2</sub>-fold change 0 (and log<sub>2</sub>-fold change 2) and predicted correlation in expression between miRNA-mRNA pairs.** A positive correlation means miRNA-mRNA pairs were both highly or lowly expressed, and a negative correlation that they exhibit reciprocal expression. Annotations for the genes in each category are given in Supplementary Table S9.

|                              | Up-regulated in CR | Down-regulated in CR |
|------------------------------|--------------------|----------------------|
| <b>Pearson's r &gt; 0.5</b>  | 33 (6)             | 5 (1)                |
| <b>Pearson's r &lt; -0.5</b> | 33 (7)             | 4 (0)                |

## Figures

**Figure 1. CR *Daphnia magna* lived approximately 15 days longer than NF *D. magna* on average.** A) Point estimates are mean longevity across clones for each treatment and whiskers are standard errors. B) Survivorship between treatments varied among the eight different *D. magna* genotypes (dashed line = NF, solid line = CR); Clone 32 is labelled in bold in the upper-left plot.

**Figure 2. DESeq2 generated PCA plots of regularized logarithm transformation of data of replicates in the nutrition experiment.** Shapes define treatment, and colour defines mother. Figure legend: NF = normal food, CR = caloric restriction. Dashed lines indicate relationship between replicates paired by mother; these are always divided along the x-axis in the same direction.

**Figure 3. Transcript proportion plots and protein domains for differentially used transcripts of an up-regulated di-domain haemoglobin.** Transcripts 11, 12, and 21 respectively of gene Dapma7bEVm014981 show DTU across conditions in DEXSeq and transcript 12 in DRIMSeq adjusted results. Bars represent proportions of total gene expression for that transcript per replicate and diamonds DRIMSeq fitted values: NF = normal food and CR = caloric restriction. Di-domain haemoglobin and erythrocrucorin domains for transcript 12 are shown; arrows below indicate one erythrocrucorin domain is missing in transcript 11 and none occur in transcript 21, although both still encode a di-domain haemoglobin like transcript 12.

**Figure 4. REVIGO scatter plots of enriched biological process GO terms for Caloric Restriction versus Normal Food.** GO terms are grouped by REVIGO into broader categories indicated by colour and legend, Circle size is  $-\log_{10}$  of the topGO enrichment p-value with scales inset next to each plot. A) Higher expression in CR Biological Process GO terms, B) Higher expression in NF Biological Process GO terms C) Higher expression in CR molecular function GO terms C) Higher expression in CR molecular function GO terms, D) Higher expression in NF molecular function GO terms. GO terms associated with numbers can be found in Supplementray Table S10.

**Figure 5. Gene Set Enrichment Analysis ridge plot for significant KEGG terms.** Ridge plots are density plots of the frequency of log<sub>2</sub> fold-change values per gene within each enriched KEGG group, which helps to interpret the up- or down-regulation of that KEGG category. The plot was created in clusterProfiler using

KEGG orthologue annotations and log<sub>2</sub>-fold changes per gene calculated by DESeq2 during differential expression analysis. X-axis is log<sub>2</sub>-fold change in expression for genes present in each KEGG category plotted, with positive values indicating increased expression in CR replicates and negative values in NF replicates. Peaks are coloured by corrected p-value as shown by the legend and corrected p-value and q-values are shown per KEGG category. KEGG term definitions: K08852=serine/threonine-protein kinase/endoribonuclease IRE1; K03070=preprotein translocase subunit secA; K11715=serine/threonine-protein kinase/endoribonuclease IRE2; K01183=chitinase; K15001=cytochrome P450 family 4; K03098=apolipoprotein D and lipocalin family protein.

## Supplementary Tables

**Supplementary Table S1.** Raw and filtered reads per replicate included in this experiment.

**Supplementary Table S2.** DESeq2 output for significant genes at log<sub>2</sub>-fold change 0. Column 1 = gene name, column 2 = mean expression level of gene, column 3 = log in base two fold change, column 4 = log<sub>2</sub>-fold change standard error, column 5 = p-value, column 6 = false discovery rate adjusted p-value.

**Supplementary Table S3.** DESeq2 output for significant genes at log<sub>2</sub>-fold change 1. Column 1 = gene name, column 2 = mean expression level of gene, column 3 = log in base two fold change, column 4 = log<sub>2</sub>-fold change standard error, column 5 = s-value.

**Supplementary Table S4.** DESeq2 output for significant genes at log<sub>2</sub>-fold change 2. Column 1 = gene name, column 2 = mean expression level of gene, column 3 = log in base two fold change, column 4 = log<sub>2</sub>-fold change standard error, column 5 = s-value.

**Supplementary Table S5.** Gene annotations and expression levels in TPM for significant genes with higher expression under caloric restriction and higher under normal food respectively: 1 and 2 = genes expressed at greater than 10000 mean for log<sub>2</sub>-fold change 0; 3 and 4 = all expression levels for log<sub>2</sub>-fold change 1; 5 and 6 = all expression levels for log<sub>2</sub>-fold change 2.

**Supplementary Table S6.** Molecular function GO terms enriched in differentially expressed genes at each log<sub>2</sub>-fold change level after enrichment testing in topGO at alpha = 0.05. GO.ID = GO term identifier, Term = description of GO term, Annotated = number of genes annotated with this term, Significant = number of significant genes for the specified contrast annotated with this term, Expected = expected number of significant genes for the specified contrast annotated with this term, weight01 = p-value for GO term.

**Supplementary Table S7.** Biological Process GO terms enriched in differentially expressed genes at each log<sub>2</sub>-fold change level after enrichment testing in topGO at alpha = 0.05. GO.ID = GO term identifier, Term = description of GO term, Annotated = number of genes annotated with this term, Significant = number of significant genes for the specified contrast annotated with this term, Expected = expected



number of significant genes for the specified contrast annotated with this term, weight01 = p-value for GO term.

**Supplementary Table S8.** mRNA-miRNA pairs predicted by at least four of five tools. mrna = *Daphnia* gene, mirna = *Daphnia* miRNA, microtar/miranda/pita/rna22/rnahybrid = target prediction tool, binding\_sites = number of binding sites in 3' UTRs of mRNA, no\_tools = number of tools that predicted a binding site, closest miRbase homolog = as identified in supplementary table S4 of Hearn et al (2018).

**Supplementary Table S9.** Gene descriptions for genes included in Table 3, annotations for genes in each of the four possible combinations are given. CR = caloric restriction.

**Supplementary Table S10.** GO terms for each numbered circle in Figure 4.

### Supplementary Files

**Supplementary File S1.** R code used to analyse clone survival at each food level and model outputs in part 1, R code to identify differential gene expression using DESeq2 in part 2, and differential transcript usage using DEXSeq, DRIMSeq and stageR in part 3, topGo functional enrichment in part 4, and clusterProfiler gene set enrichment analysis in part 5, R code for creating REVIGO-derived scatter plots of enriched GO terms in part 6.

**Supplementary File S2.** Raw clone longevity data for all eight clones input into R survival analysis; R code given in Supplementary File S1, part 1.

**Supplementary File S3.** MultiQC results for FastQC read data-quality assessment, this file is in html format.

**Supplementary File S4.** DRIMSeq proportion plots for the 112 genes with significant differential transcript usage in common between DESeq and DRIMSeq. There are two plots per gene, one a barplot and the other a line plot.

**Supplementary File S5. Correlation of methylation proportion and mean expression for caloric restriction and normal food datasets.** Methylation data adapted from (Hearn, Pearson, et al., 2019). For CR and NF 2029 and 2033 genes respectively with a methylation rate greater than 5%, a TPM expression mean over 10 and non-overlapping genome annotation were included, and the Y-axis was limited to a TPM expression of 10000. Kendall's tau and Spearman's rho values are inset, Bonferroni-Holm corrected p-values for all correlations were highly significant at  $p < 1 \times 10^{-6}$ . The regression line in blue with grey confidence intervals is for Kendall's tau correlations.

A)

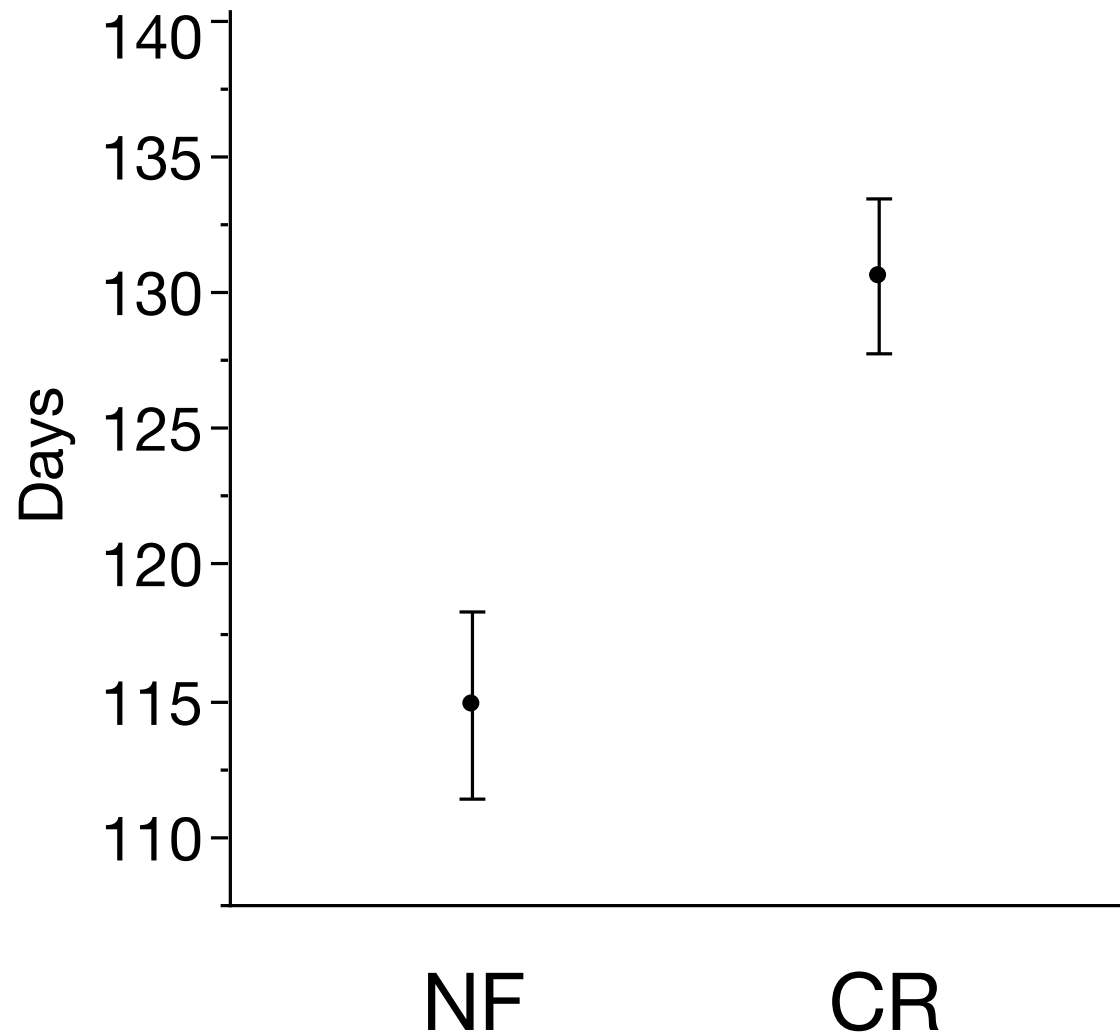

B)

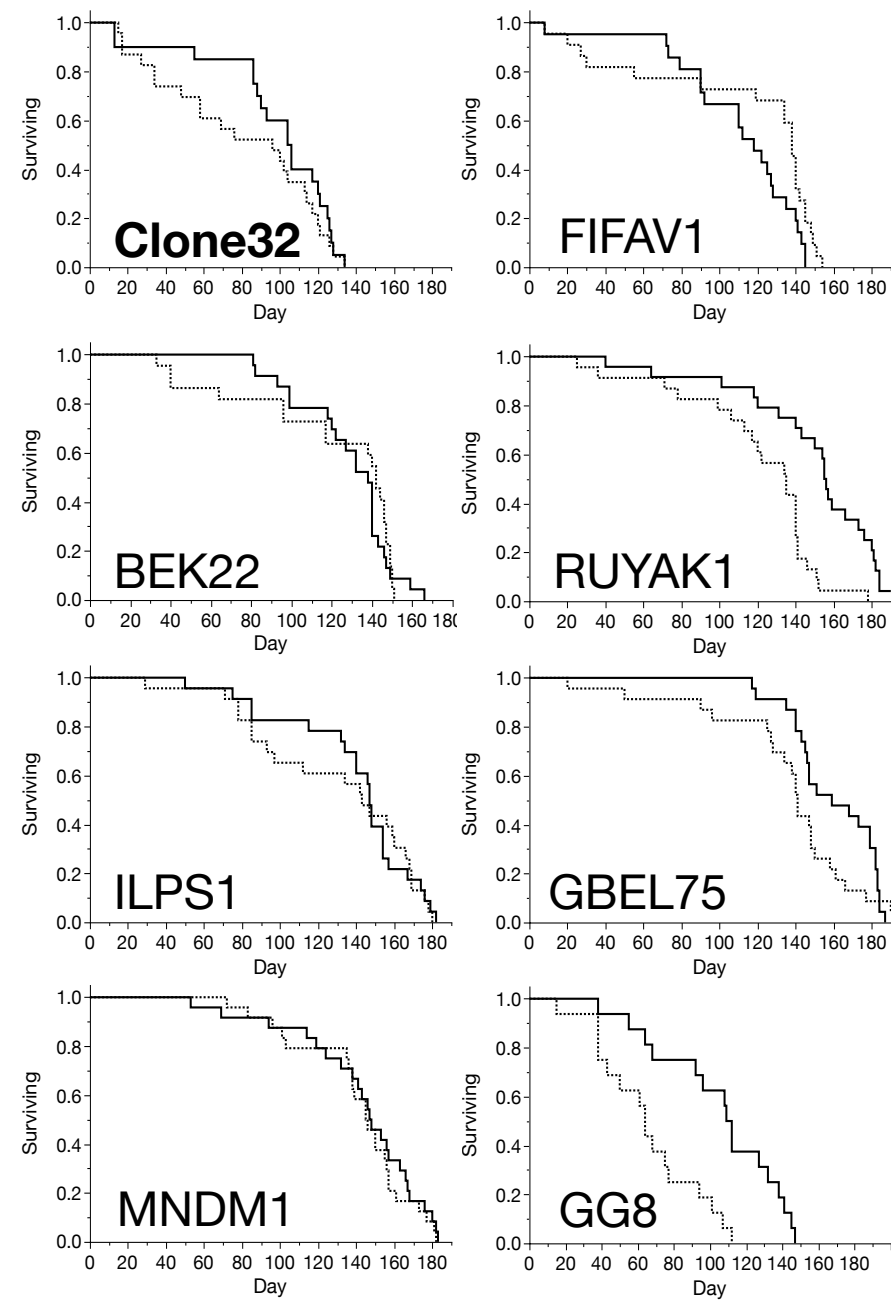

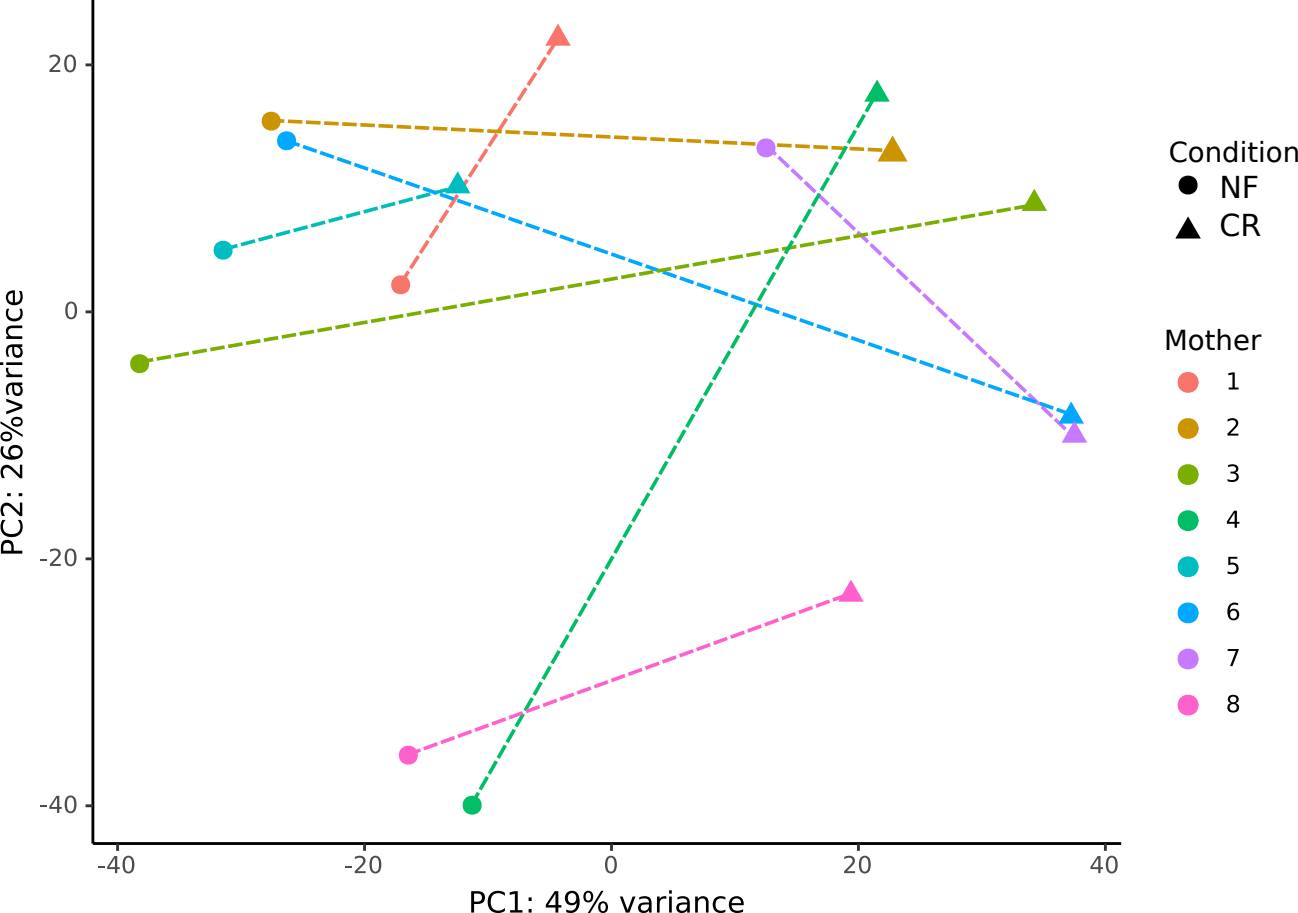



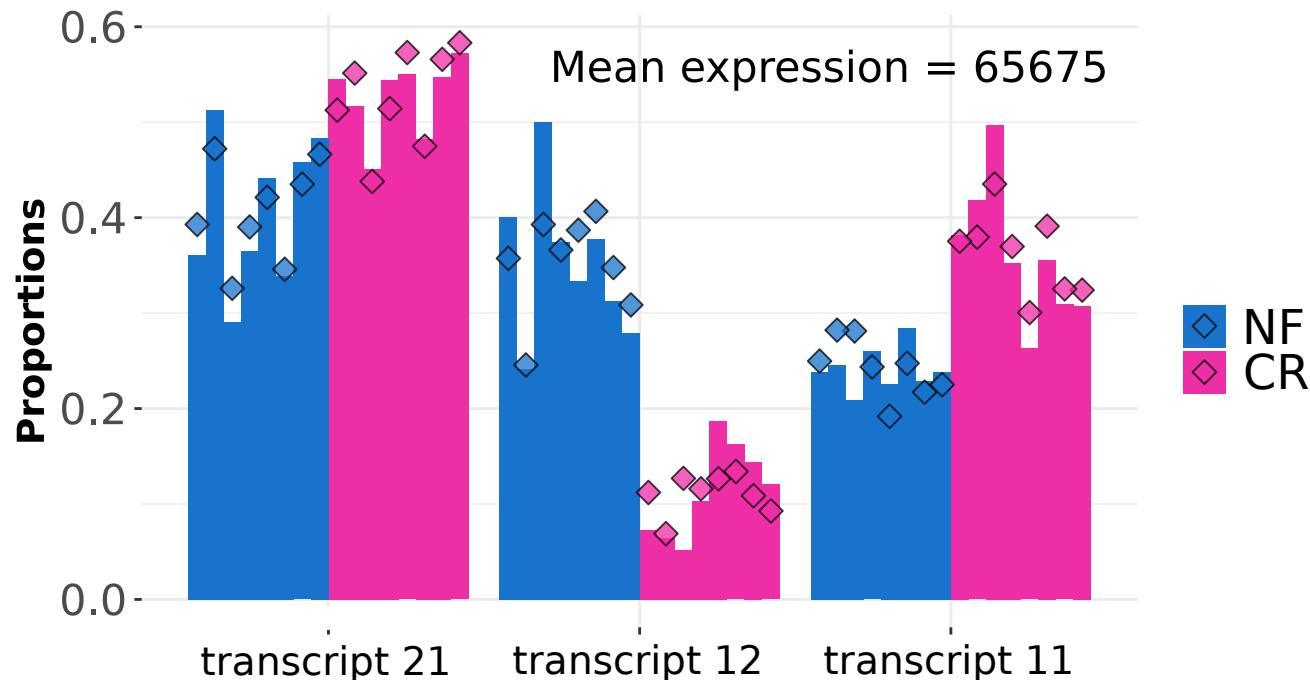

Dapma7bEVm014981 transcript 12 Di-domain Haemoglobin

Globin/Protoglobin

Globin-like superfamily

Erythrocrucorin domains

Erythrocrucorin domains not present in transcript 21

Erythrocrucorin domain not present in transcript 11

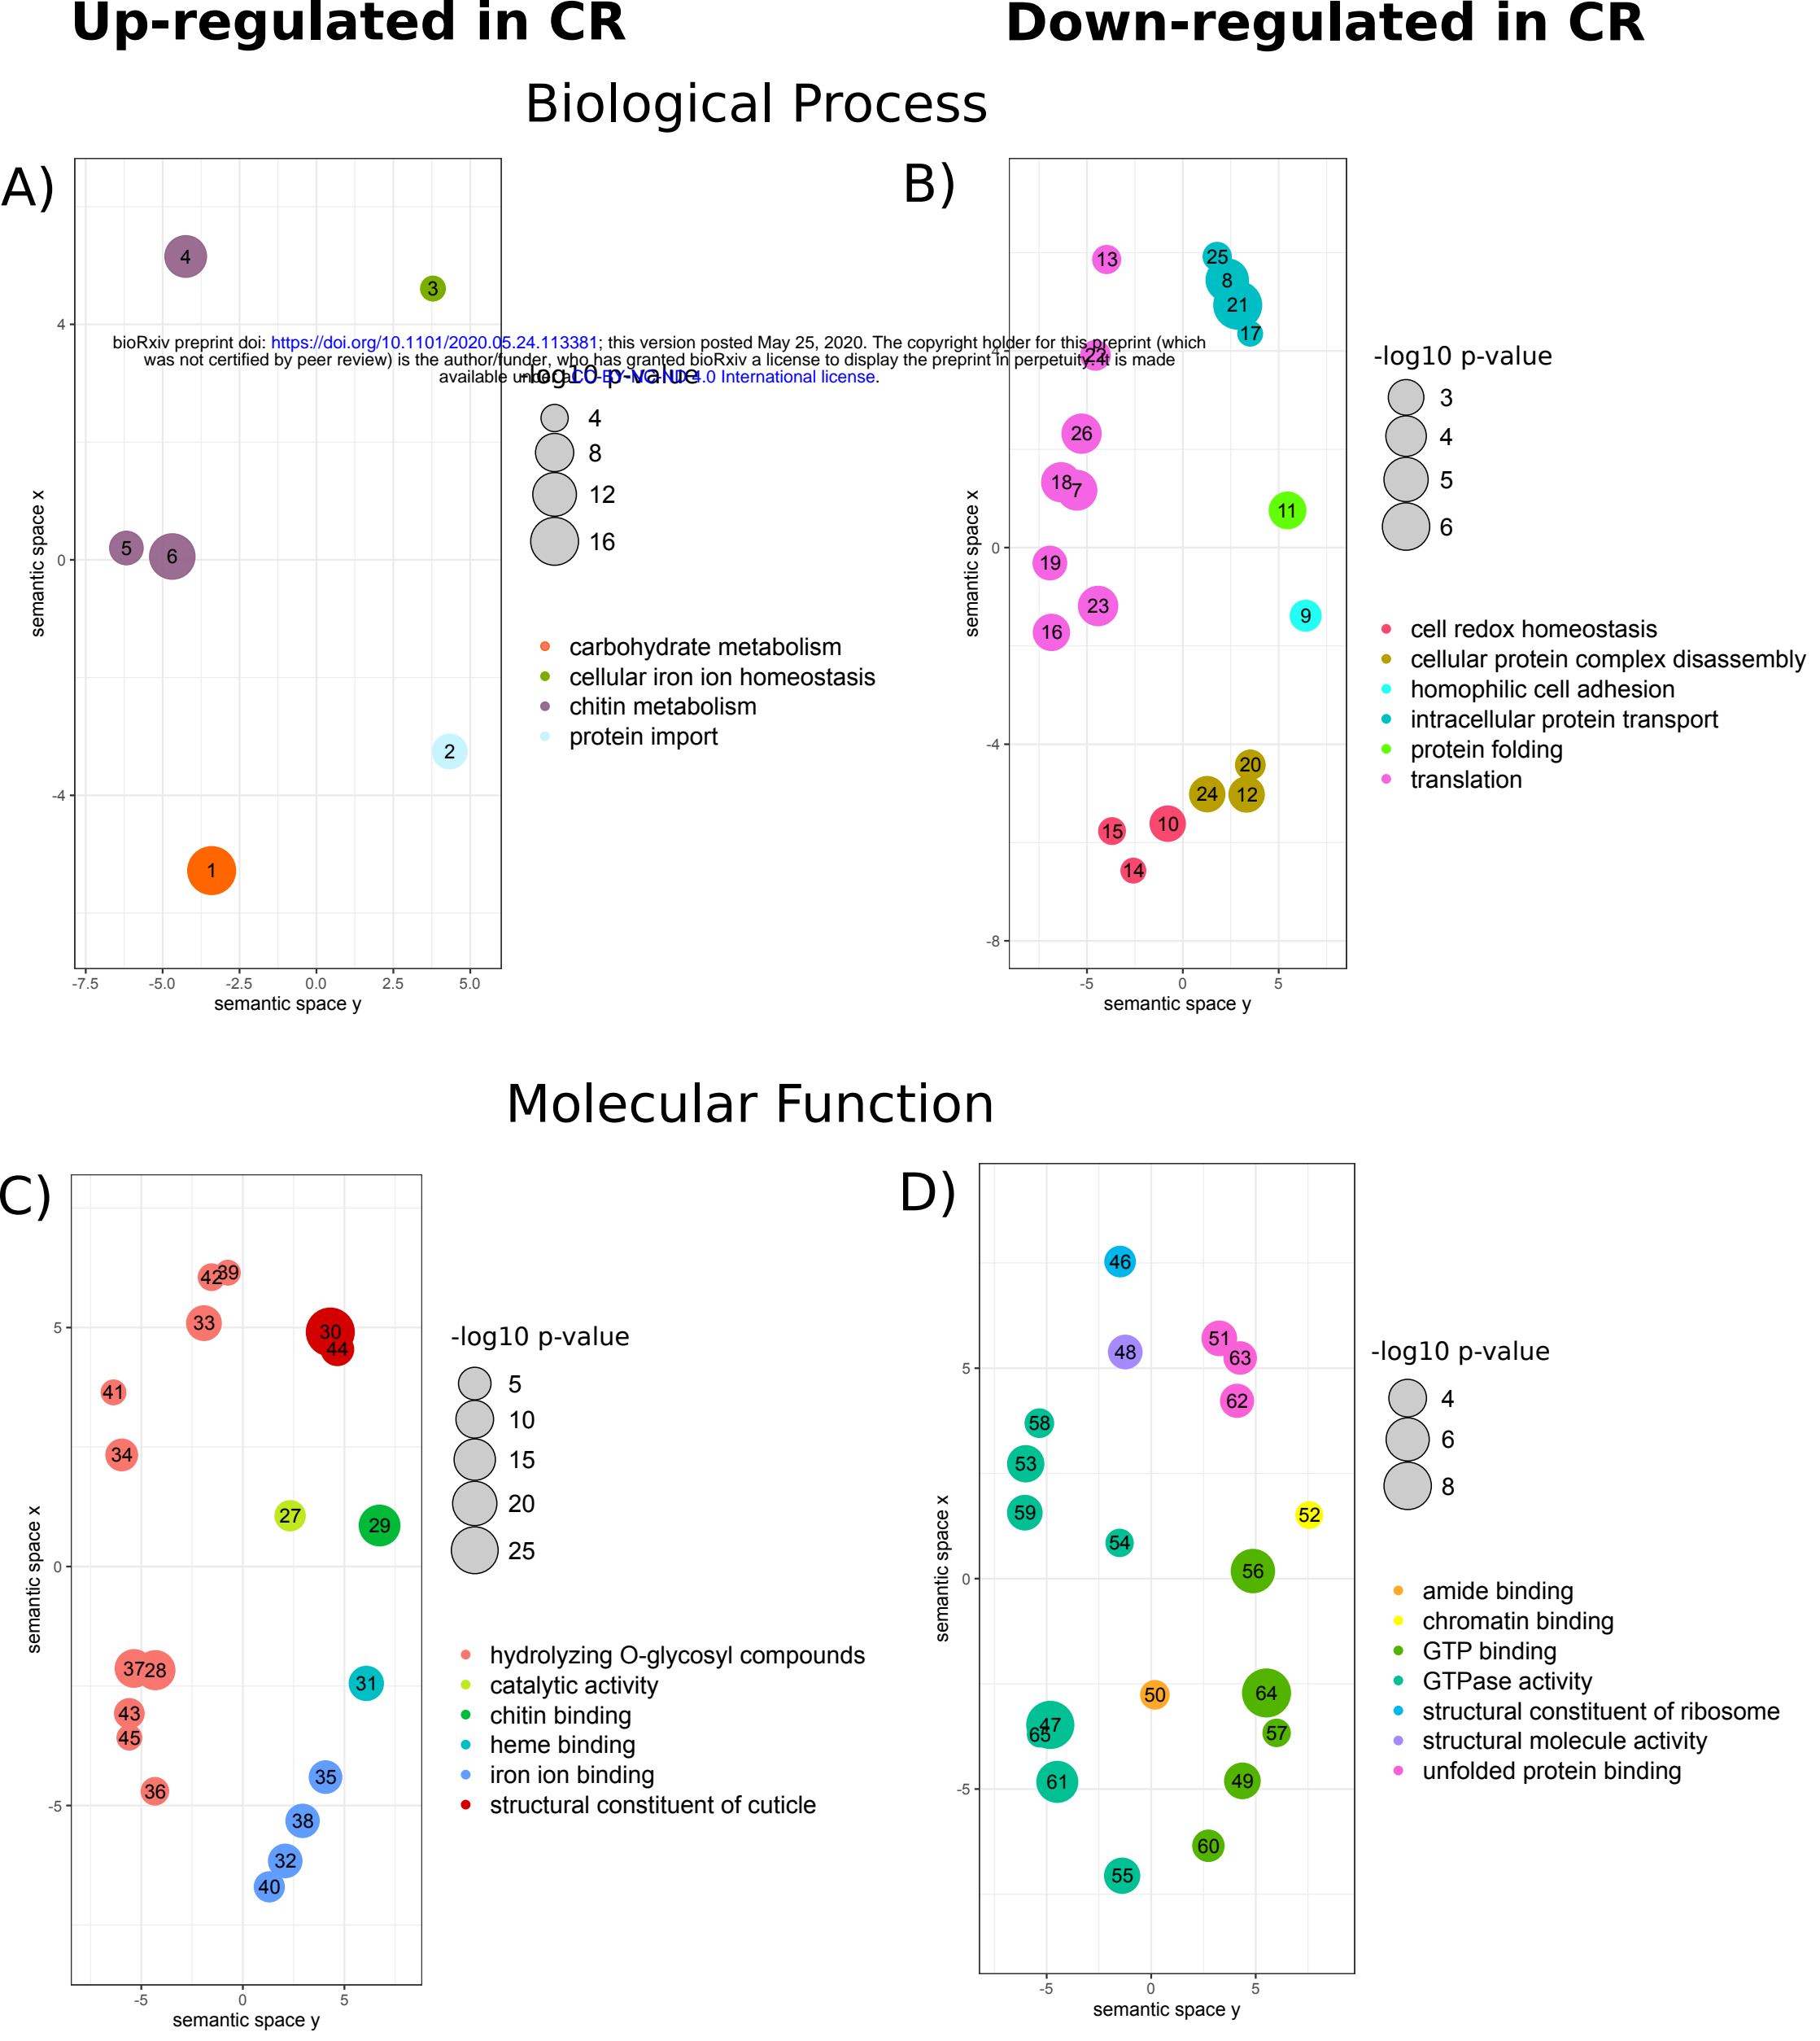

Down-regulated in CR  $\longleftrightarrow$  Up-regulated in CR

KEGG

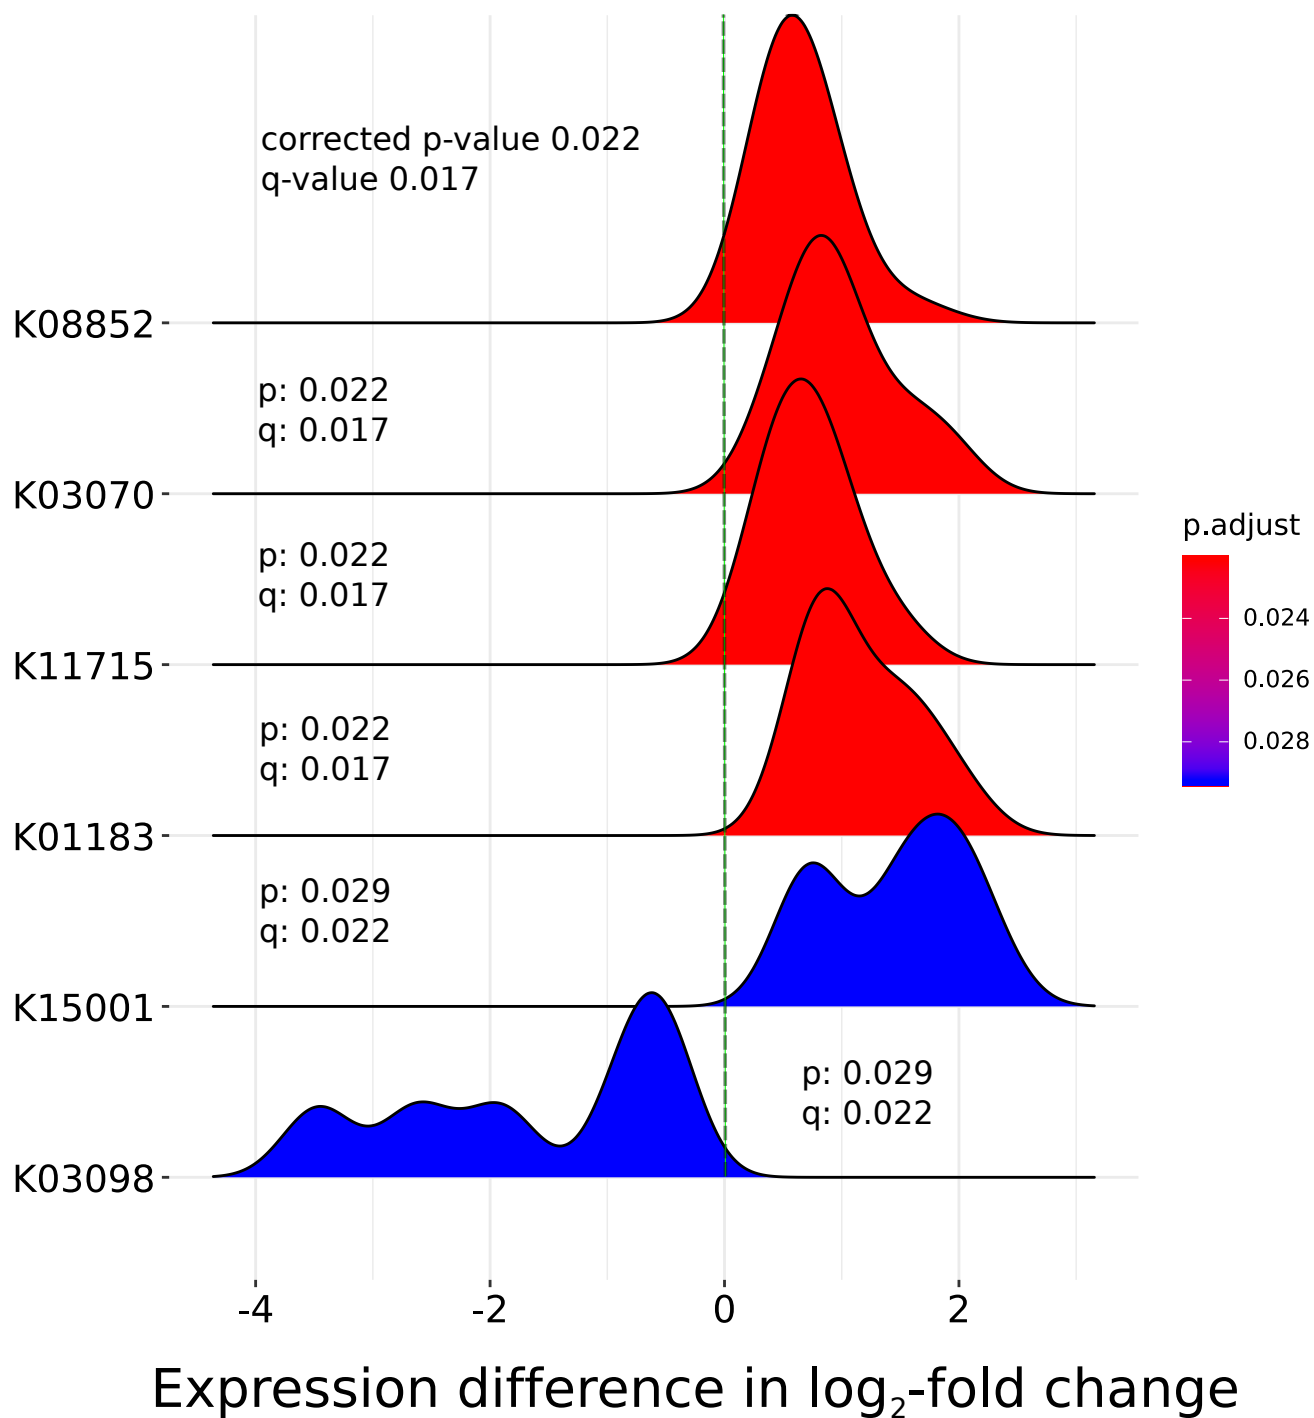

Source: http://biorxiv.org/content/10.1101/2020.05.24.113381v1.full.pdf
